# Supplementary material for: Targeting of epigenetic co-dependencies enhances anti-AML efficacy of Menin inhibitor in AML with MLL1-r or mutant NPM1
Source: PubMed Central journal article supplement (PMC10102188; doi:10.1038/s41408-023-00826-6), 2023-04-13

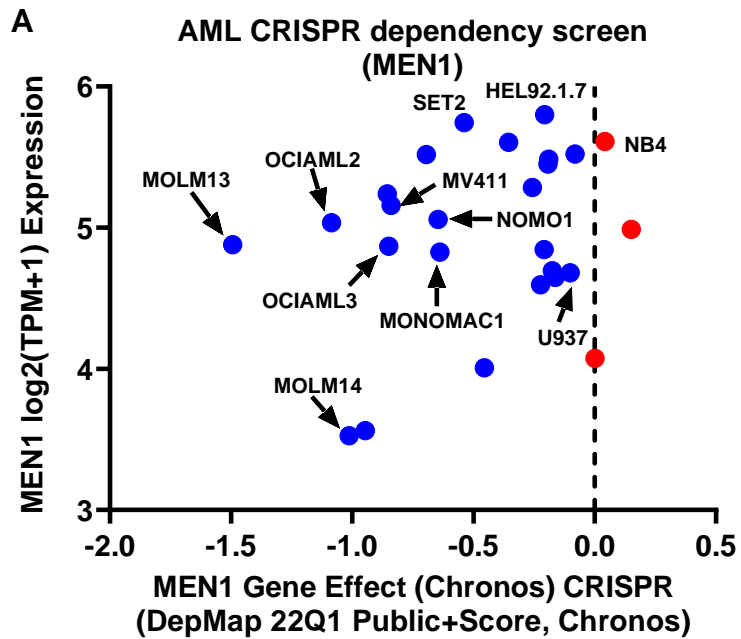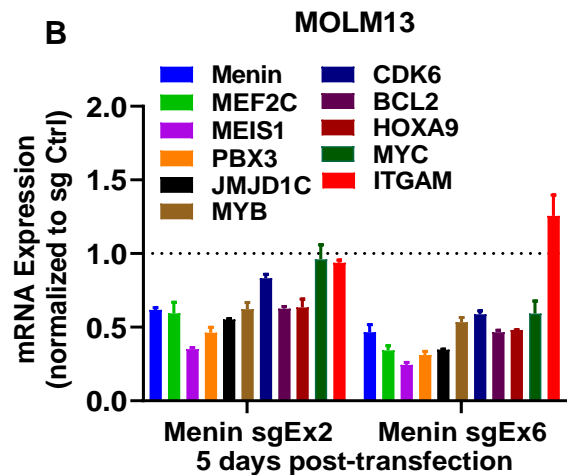

Figure S1

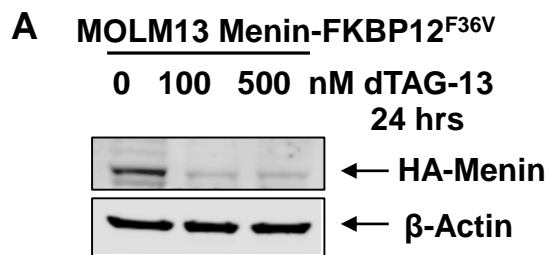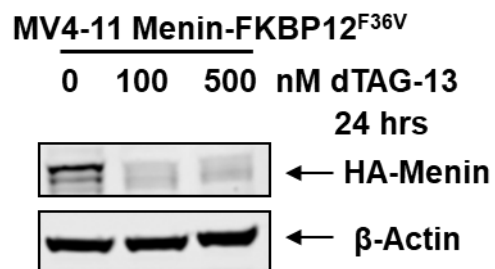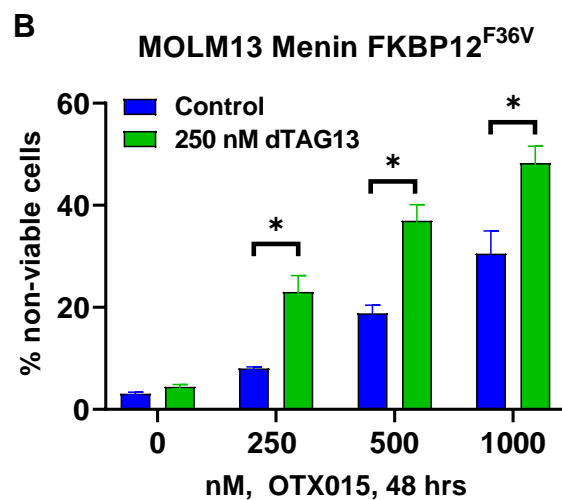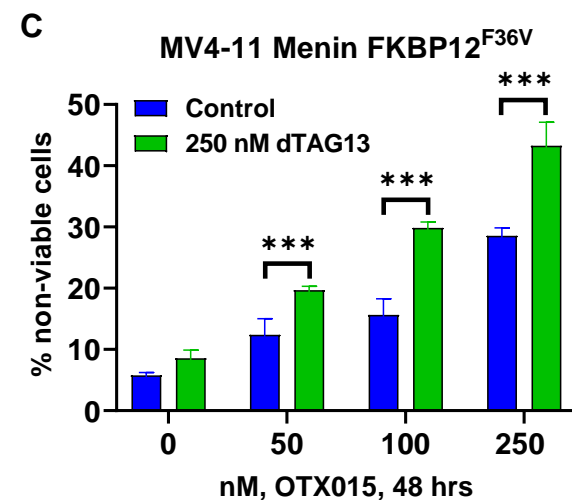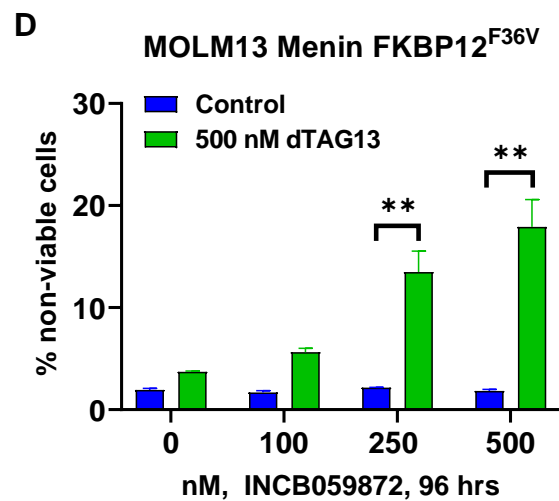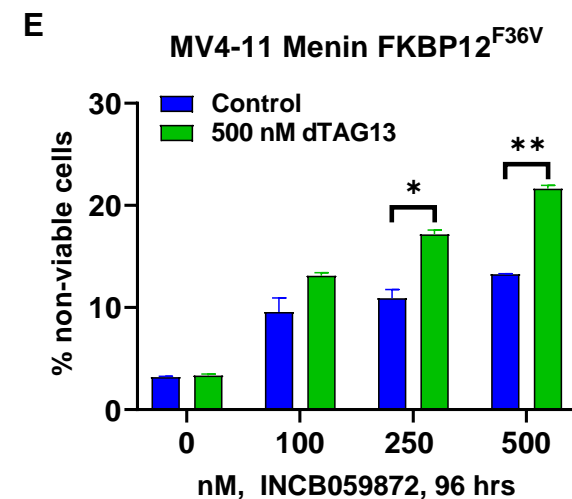

Figure S2

**A****MOLM13**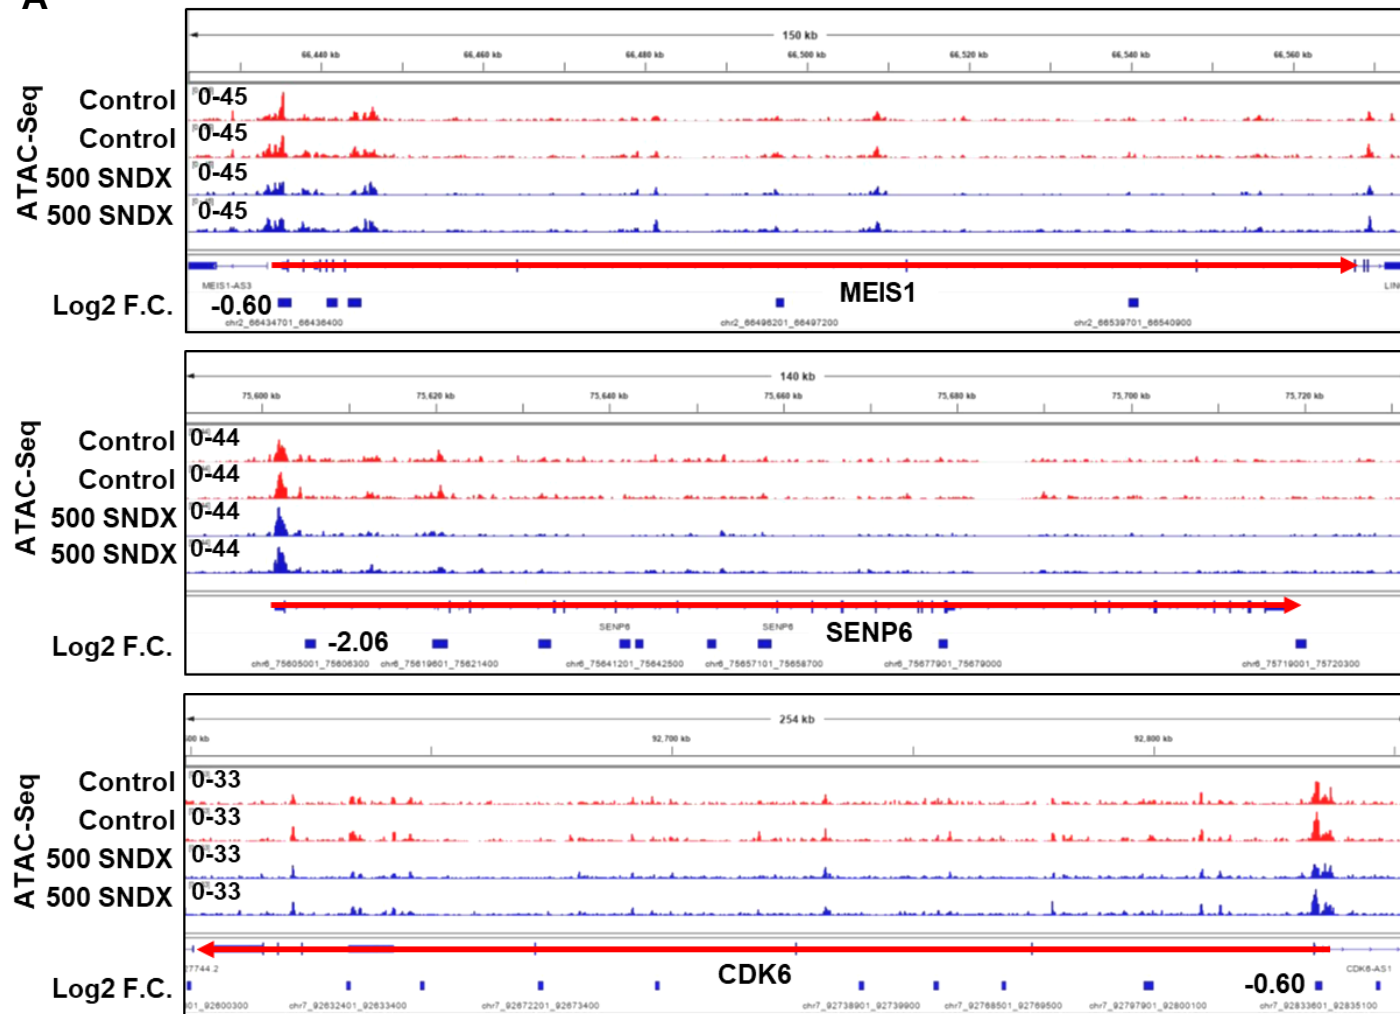**Figure S3**

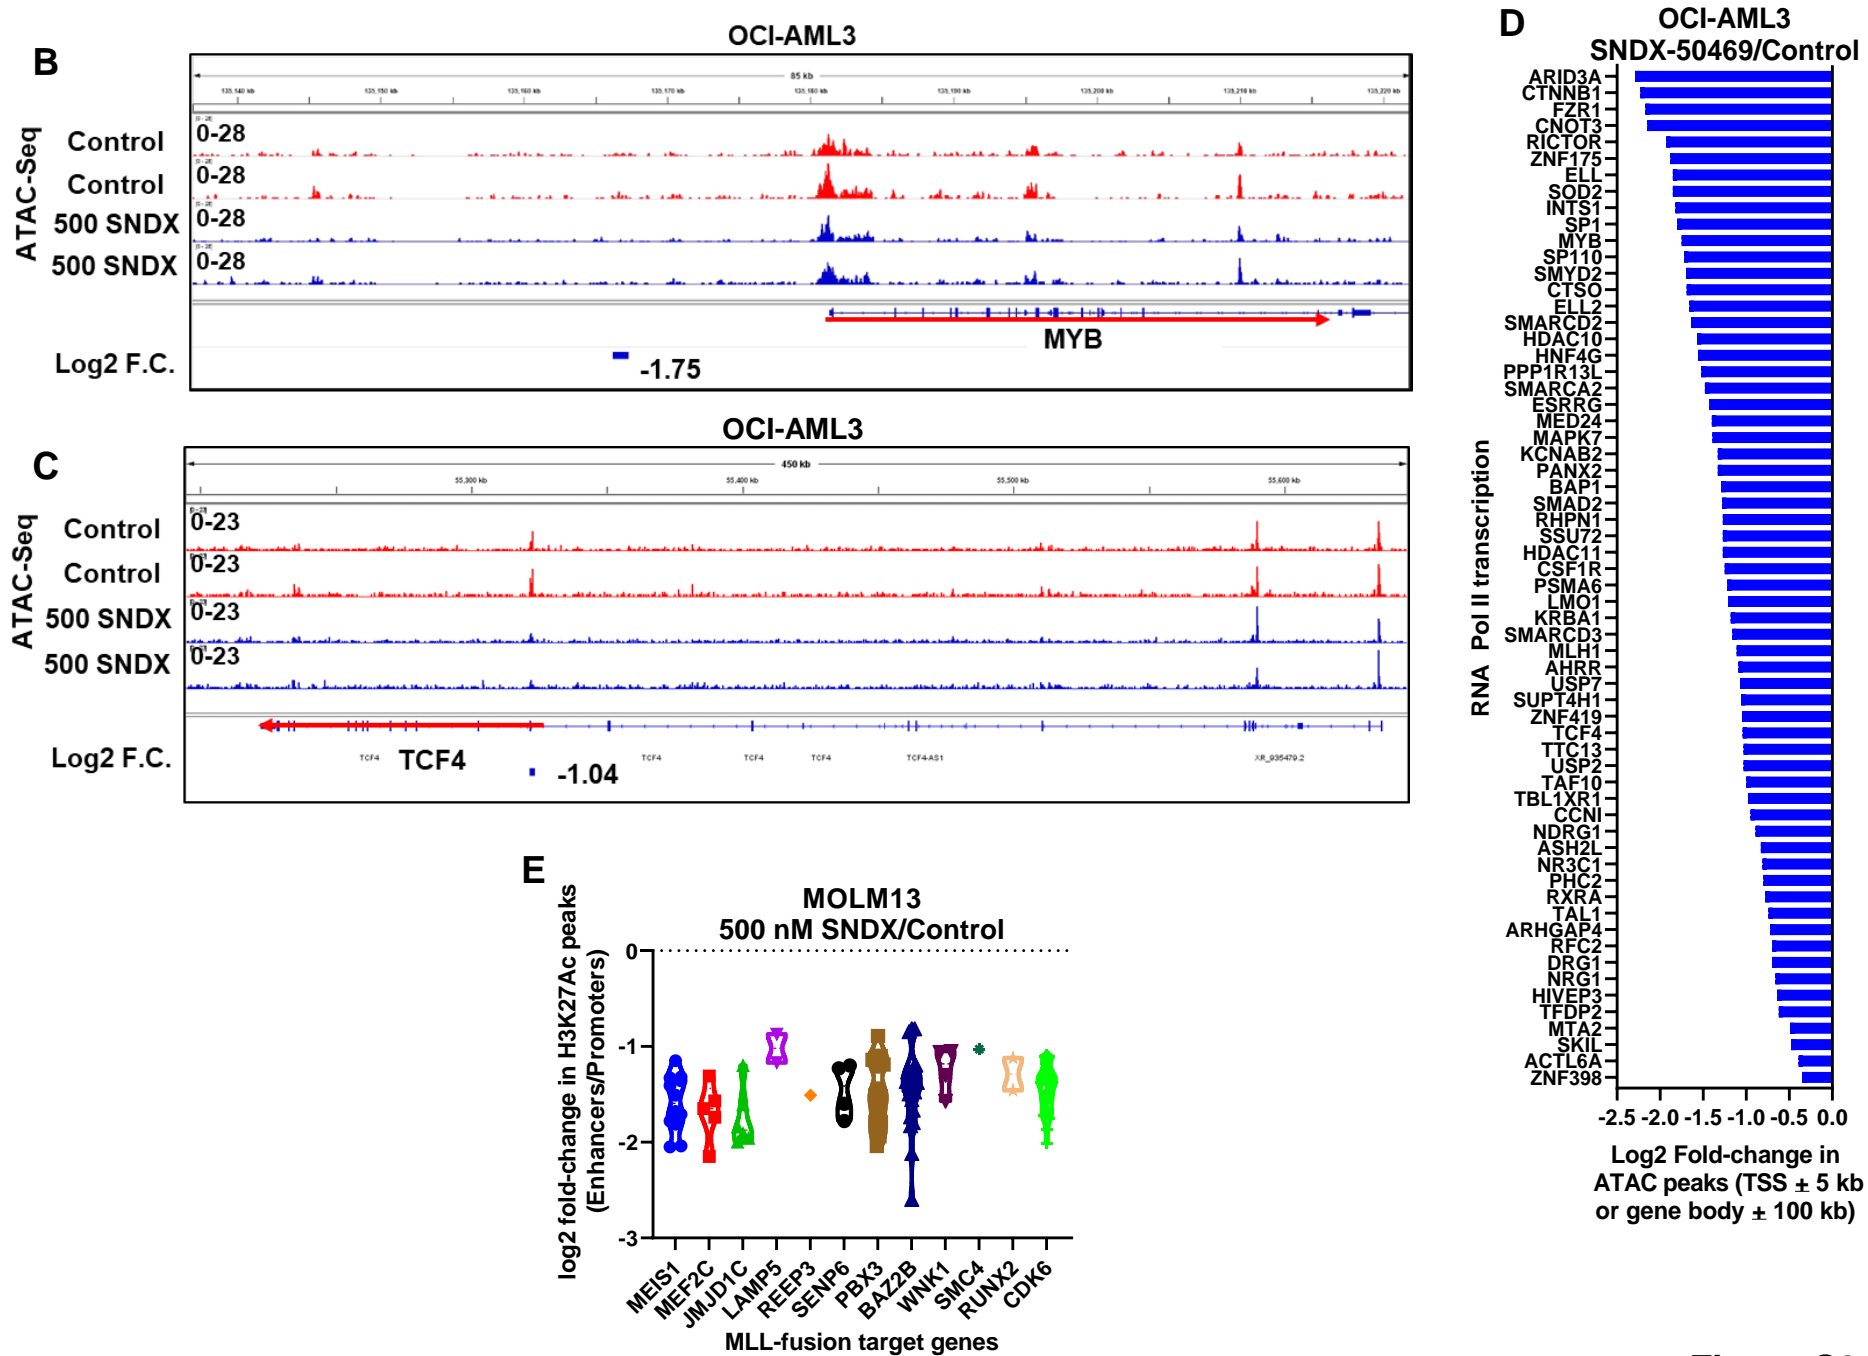

Figure S3

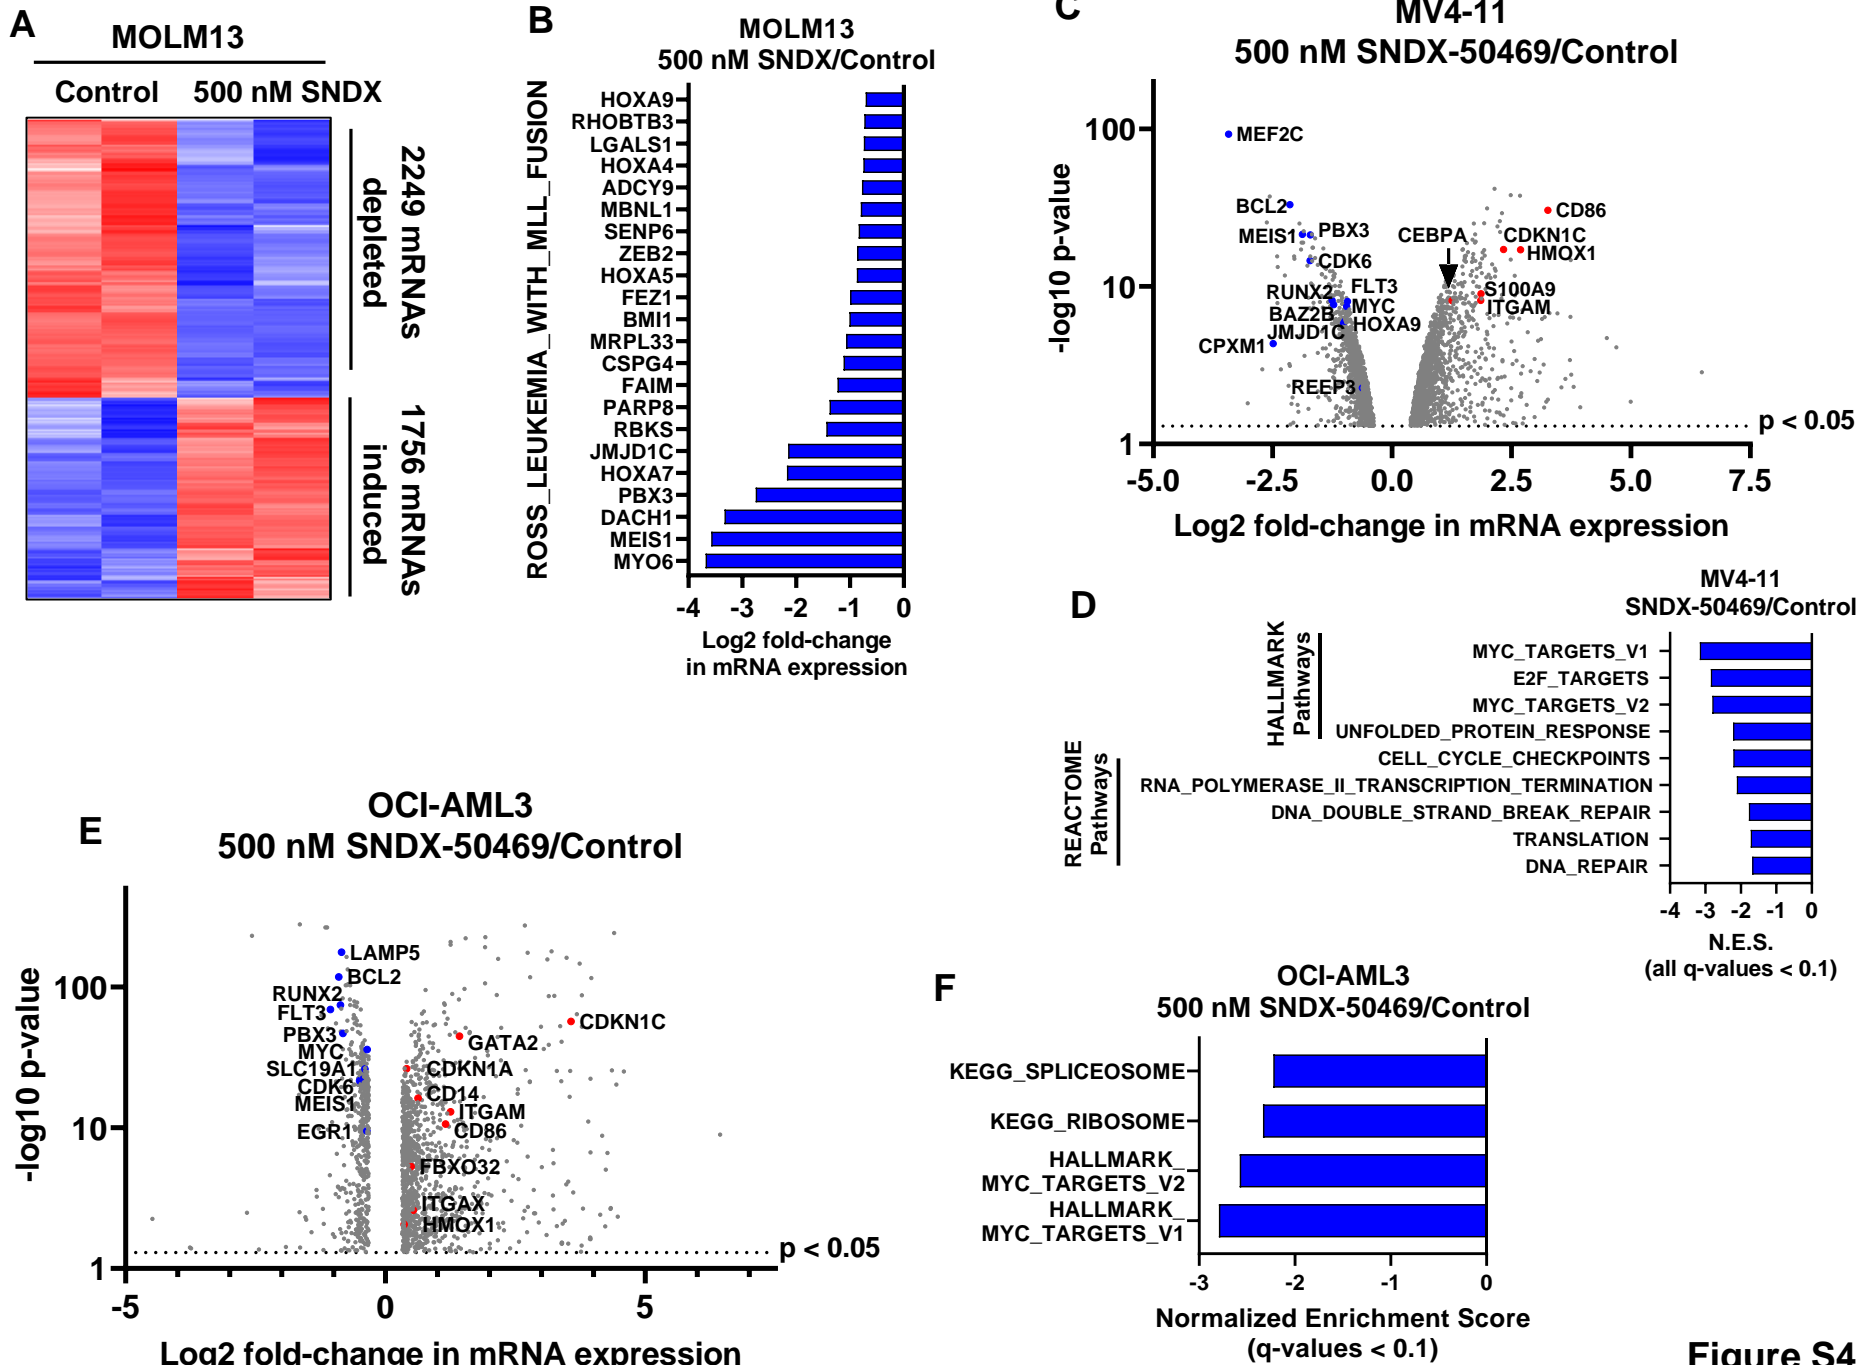

Figure S4

G

## OCI-AML3 SNDX-50469/Control

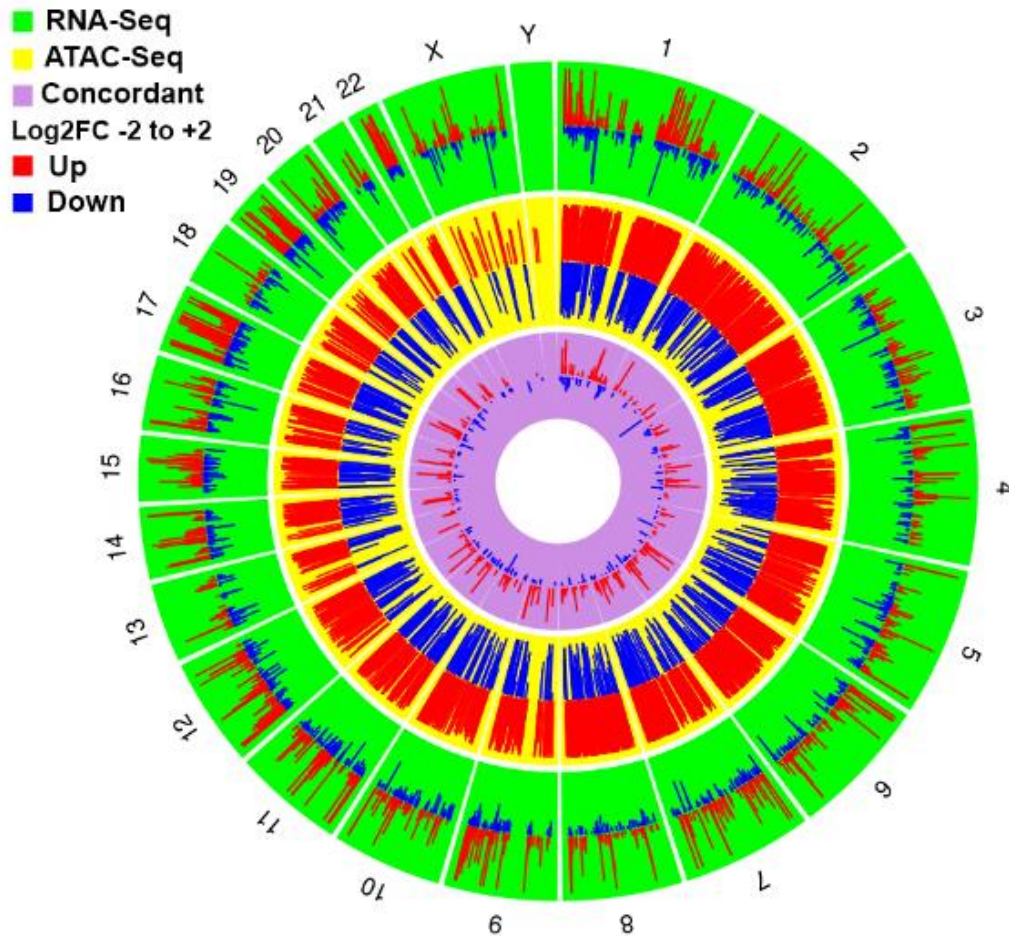

|                                              |      |
|----------------------------------------------|------|
| # of genes upregulated in RNA-Seq            | 2301 |
| # of genes down-regulated in RNA-Seq         | 2500 |
| # of differential peaks gained in ATAC-Seq   | 3354 |
| # of differential peaks lost in ATAC-Seq     | 1134 |
| # of up genes in both RNA-Seq and ATAC-Seq   | 267  |
| # of down genes in both RNA-Seq and ATAC-Seq | 192  |
| # of genes common in RNA-Seq and ATAC-Seq    | 832  |

H

OCI-AML3  
500 nM SNDX-50469/Control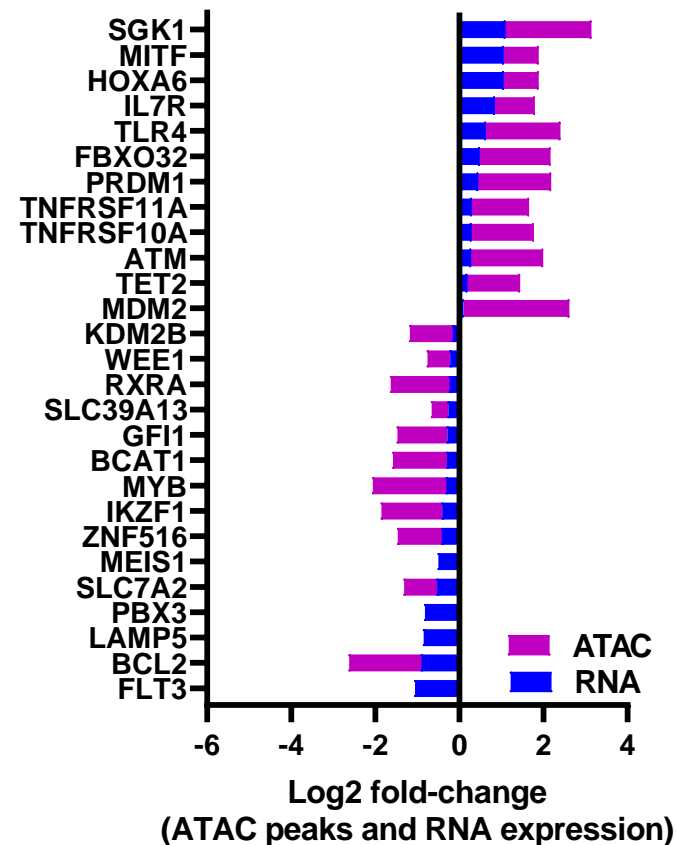

Figure S4

**A**

**SNDX-50469 induced mRNAs**

**OCI-AML3**

**MOLM13**

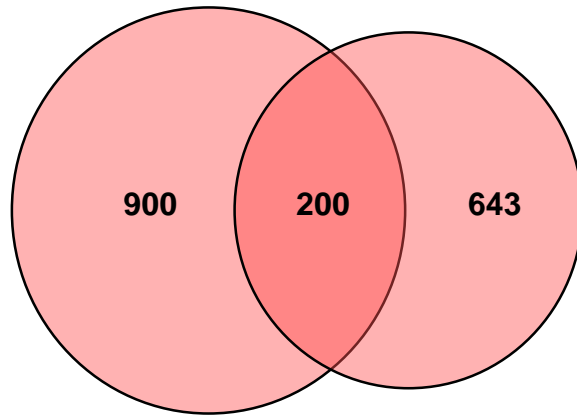

**B**

**SNDX-50469 depleted mRNAs**

**OCI-AML3**

**MOLM13**

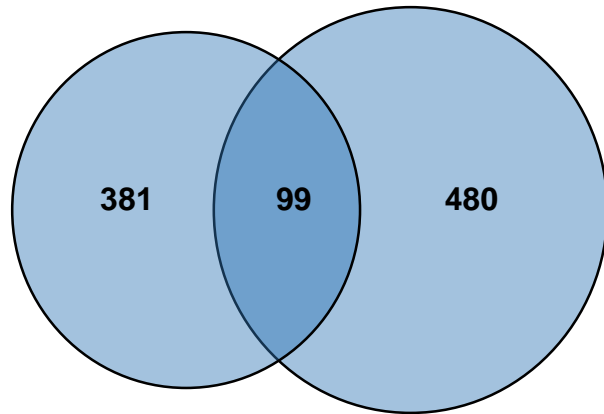

C

| Gene Name | OCI3_log2<br>Fold-Change | MOLM_log2<br>Fold-Change |
|-----------|--------------------------|--------------------------|
| ANXA1     | 0.769126671              | 2.050580391              |
| METTL7A   | 1.130841473              | 0.847360602              |
| TUBA1A    | 1.131696753              | 0.344448454              |
| SAMD9L    | 1.15998037               | 0.983014002              |
| LRP10     | 0.586423591              | 0.412973253              |
| FUCA1     | 0.951084363              | 0.431478809              |
| TPPP      | 1.620478169              | 0.619654256              |
| KIAA0040  | 1.618970702              | 1.50893655               |
| LILRA2    | 0.643202581              | 0.913427186              |
| TLR4      | 0.635016328              | 1.279735163              |
| ABCA7     | 0.576437837              | 0.587335732              |
| IL7R      | 0.850877104              | 0.348329468              |
| USP53     | 0.709446237              | 0.544774289              |
| C3        | 0.662770705              | 1.170914352              |
| F11R      | 1.018595921              | 0.485488884              |
| MT2A      | 0.810602932              | 0.408295396              |
| KLHL24    | 0.637013546              | 0.484316086              |
| SLC43A2   | 0.59555641               | 0.50981815               |
| BMF       | 0.800350424              | 0.921079652              |
| RAB7B     | 0.370740315              | 0.453151312              |
| HELZ2     | 0.573110271              | 0.367427521              |
| ARID5B    | 0.903714225              | 1.159021156              |
| KIAA0513  | 0.937634336              | 1.639889271              |
| BNIP3L    | 0.387214989              | 0.764398148              |
| TRAF3IP3  | 0.581943578              | 0.584583799              |
| SLA       | 0.381566838              | 0.794559452              |
| APOL6     | 0.494915234              | 0.484327997              |
| IDS       | 0.678759958              | 0.874018668              |
| RAB37     | 0.480812763              | 0.718738274              |
| MAP3K12   | 0.841452642              | 1.161111127              |
| CDC42EP4  | 0.511644176              | 0.475287129              |
| MBNL2     | 0.661794997              | 0.777167958              |
| CD37      | 0.571849756              | 0.527531943              |
| PIM1      | 0.960371466              | 0.393803711              |
| PIAS3     | 0.435995338              | 0.470304992              |
| ITPR2     | 1.00949731               | 0.794325161              |
| CPNE3     | 0.38318417               | 0.344449832              |
| NLRP1     | 0.454880994              | 1.838673337              |
| CCNG2     | 0.446809137              | 0.878540435              |
| KIFC2     | 0.614202696              | 0.353068603              |
| NFKB2     | 0.410809367              | 0.463385655              |
| ABTB1     | 0.663619868              | 0.835468289              |
| SYNE1     | 0.836854313              | 2.893787405              |
| KIAA1551  | 0.424826036              | 0.440958201              |
| TSPOAP1   | 0.443018333              | 0.685331799              |
| RUBCN     | 0.396341924              | 0.404241031              |
| CFP       | 0.703229456              | 1.097445997              |
| PDE4DIP   | 0.632014406              | 0.651619635              |
| FAM111A   | 0.341067852              | 0.333478141              |
| SLC26A2   | 0.53570467               | 0.61464032               |
| CXCL10    | 1.155943052              | 1.487722805              |
| UBE2L6    | 0.449416641              | 0.669729105              |
| NAGK      | 0.52341085               | 0.453570925              |
| FCGR2B    | 1.716012032              | 2.410834719              |
| PBXIP1    | 0.353484532              | 0.479179443              |
| NBR1      | 0.335671912              | 0.326441308              |
| CBLB      | 0.584379329              | 0.726848329              |
| GCC2      | 0.464075595              | 0.466215135              |
| ACSF2     | 0.761642782              | 0.63179147               |
| ZNF467    | 0.724357328              | 1.149804555              |
| SYNPO     | 0.588428558              | 1.773983207              |
| SLC12A6   | 0.408187986              | 0.520058354              |
| CLCN3     | 0.35760623               | 0.329313288              |
| SV2A      | 0.376638509              | 0.403405555              |
| ITGAM     | 1.250935324              | 1.193462384              |
| GLTP      | 0.446658991              | 0.640877051              |
| IFI6      | 0.769288621              | 1.657136986              |
| IFFO2     | 1.187968924              | 0.711287958              |
| MYOF      | 0.461753939              | 0.807093904              |

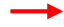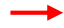

| Gene Name | OCI3_log2<br>Fold-Change | MOLM_log2<br>Fold-Change |
|-----------|--------------------------|--------------------------|
| BCAS3     | 0.465697456              | 0.825372617              |
| TMEM87B   | 0.348431114              | 0.489412108              |
| NTNG2     | 1.445280839              | 0.897482732              |
| UACA      | 0.754659674              | 0.590032069              |
| ZSWIM8    | 0.346082636              | 0.412243771              |
| JUN       | 0.394618945              | 0.952660108              |
| NRBP2     | 0.408903007              | 0.451528558              |
| APOL2     | 0.420470922              | 0.380280201              |
| WDR19     | 0.604602433              | 0.390017731              |
| CD86      | 1.158144941              | 1.06250525               |
| CX3CR1    | 0.514037521              | 2.017295783              |
| CTTNBP2NL | 0.49399208               | 0.70557269               |
| SLC44A2   | 0.654738008              | 0.701089744              |
| BBS2      | 0.362820962              | 0.607857715              |
| STXBP1    | 0.448022756              | 0.687281846              |
| C3AR1     | 1.221694645              | 0.932697656              |
| TOM1L2    | 0.452707302              | 0.364755292              |
| AKAP9     | 0.357819474              | 0.446521618              |
| ZYG11B    | 0.335492213              | 0.436903929              |
| PDLIM2    | 0.433078413              | 0.513401917              |
| RAB11FIP1 | 0.342800412              | 0.527339301              |
| CD244     | 0.807034237              | 0.514357051              |
| SLFN5     | 1.516432134              | 1.492366991              |
| GPR137    | 0.421547566              | 0.578150348              |
| HIPK2     | 0.330923464              | 0.727141182              |
| YPEL3     | 0.521502865              | 1.335678725              |
| CALCOCO1  | 0.370902688              | 0.486639511              |
| ADGRB1    | 0.924347954              | 0.511838214              |
| ATP6V0A1  | 0.394250521              | 0.328040405              |
| SAT1      | 0.412683467              | 0.479306462              |
| SYT11     | 0.416628995              | 0.632954886              |
| KIAA1109  | 0.421602981              | 0.654416986              |
| ADD3      | 0.336428991              | 0.357477814              |
| SRDS5A1   | 0.408189245              | 0.655737528              |
| NCOA7     | 0.425373905              | 0.391533614              |
| RNF213    | 0.657762616              | 0.75886797               |
| RCBTB2    | 0.442344218              | 0.510846955              |
| MXD3      | 0.385632497              | 0.491572275              |
| FAM49A    | 0.359203064              | 0.628440986              |
| GATS      | 0.786452737              | 1.656471268              |
| DPYSL3    | 0.896261707              | 0.680895133              |
| SLC26A11  | 0.819788165              | 4.794263792              |
| TRANK1    | 0.726684399              | 1.310873798              |
| PGAP1     | 0.529706087              | 1.315518698              |
| ATP7A     | 0.516784941              | 0.573020726              |
| CLSTN3    | 0.495342391              | 0.427767302              |
| GPR18     | 0.358532637              | 0.456048706              |
| JUP       | 1.462260776              | 0.852542223              |
| ARRDC3    | 0.555188435              | 1.067477118              |
| GN2       | 0.806043054              | 0.486493849              |
| ZFYVE26   | 0.330797044              | 0.469311262              |
| NCF2      | 0.881315902              | 0.811791012              |
| PGM2L1    | 0.688685588              | 0.642482906              |
| TLR6      | 0.66772655               | 0.727490497              |
| TMEM8B    | 0.723906022              | 0.860020147              |
| ABCA5     | 0.367513971              | 1.850670448              |
| CLCN5     | 0.408060293              | 0.634924917              |
| PAQR8     | 0.453174445              | 0.857923376              |
| CYTIP     | 0.839348561              | 0.719222686              |
| TLN2      | 0.821386102              | 0.438802642              |
| ZFH3      | 1.096647095              | 0.95481196               |
| EXD2      | 0.412304694              | 0.550006445              |
| C1RL      | 0.368459366              | 0.517921031              |
| ARMC9     | 0.42848912               | 0.754766431              |
| CCDC186   | 0.339177733              | 0.515035873              |
| HCN3      | 0.574924524              | 0.632203026              |
| KIF3A     | 0.372179667              | 0.89034981               |
| ST3GAL6   | 0.519346075              | 0.921253279              |
| FAM161B   | 0.666461066              | 0.736229026              |
| RBMS2     | 0.631748676              | 0.649310526              |

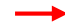

| Gene Name | OCI3_log2<br>Fold-Change | MOLM_log2<br>Fold-Change |
|-----------|--------------------------|--------------------------|
| PDE4B     | 0.352456131              | 0.758254057              |
| LILRB1    | 0.411427086              | 0.452965695              |
| MMP25     | 0.686980358              | 0.540620268              |
| ID3       | 0.824744944              | 1.860681076              |
| PPM1L     | 0.576138011              | 0.364537186              |
| TNFSF14   | 0.553042418              | 0.658494302              |
| TCP1L2    | 0.810034588              | 1.378475524              |
| IZUMO4    | 0.625807617              | 0.744764371              |
| DDX60     | 0.441978755              | 0.919900684              |
| IL16      | 0.767902742              | 0.732064488              |
| NEK1      | 0.323725029              | 0.439033443              |
| RAP1GAP2  | 0.507598612              | 0.617935404              |
| IL10RA    | 0.390770673              | 1.055185292              |
| PCNX2     | 0.526711998              | 1.243761557              |
| ZNF697    | 0.329821733              | 0.441468191              |
| ZBED6     | 0.435129938              | 0.719370258              |
| DNASE2    | 2.559981297              | 1.063533372              |
| HERC6     | 0.49650297               | 1.603392029              |
| PLXDC2    | 0.612615596              | 1.442011086              |
| WDR31     | 0.387644144              | 0.829895216              |
| SSBP2     | 0.363597643              | 0.795505674              |
| TBC1D2    | 0.522095257              | 0.360127881              |
| CLEC12A   | 1.358228349              | 0.745613028              |
| AGPAT4    | 0.766165722              | 1.255886792              |
| TRIM52    | 0.378165                 | 0.779334083              |
| ABHD4     | 0.559804822              | 0.436279846              |
| GPR68     | 0.414751909              | 0.990790546              |
| GIPR      | 1.685600231              | 0.776034697              |
| PORCN     | 0.861686867              | 0.527197971              |
| AHNAK     | 0.41599897               | 0.886870709              |
| ATP8A1    | 0.521598808              | 1.129621732              |
| SH2D3C    | 1.252554528              | 0.550206054              |
| EFHC1     | 0.352067154              | 0.781076831              |
| LILRA1    | 0.406543436              | 0.869112137              |
| TXNDC16   | 0.350555955              | 0.471645262              |
| LILRB2    | 1.337436627              | 1.752720784              |
| NBEAL1    | 0.40449611               | 0.927040292              |
| SCIMP     | 0.451203837              | 1.407058276              |
| CIITA     | 0.614624659              | 1.546655712              |
| JAML      | 1.478277329              | 0.876956842              |
| ITGAX     | 0.533639109              | 1.090570387              |
| PDE1B     | 0.463404859              | 0.575854074              |
| AVPR2     | 0.565152461              | 0.918441081              |
| CCDC146   | 0.767119293              | 1.423660585              |
| SP110     | 0.418252735              | 1.024912162              |
| ANKRD36C  | 0.419040935              | 0.596539217              |
| SPATC1    | 1.312086081              | 1.796085974              |
| LMTK3     | 0.989395453              | 0.952308957              |
| SPACA6    | 0.386970809              | 1.334299817              |
| MAP3K14   | 0.352575841              | 0.486211771              |
| ABHD8     | 0.421757524              | 0.749295326              |
| TSHZ3     | 0.578717177              | 0.943820211              |
| PRX       | 0.423918245              | 0.743940845              |
| SDS       | 1.390282554              | 1.737905939              |
| AIM1      | 0.561737512              | 0.445537147              |
| ITPR3     | 0.525410363              | 0.348512757              |
| MTMR11    | 0.355997634              | 0.466360915              |
| TMEM255B  | 0.477851949              | 0.723588463              |
| EML6      | 0.610815094              | 2.049094041              |
| RASGRF1   | 1.407975218              | 0.839551044              |
| PILRA     | 0.327575984              | 0.758696684              |

Figure S5



D

| GeneName  | OCI3_log2 FC | MOLM_log2 FC |
|-----------|--------------|--------------|
| CDKN2C    | -1.649733229 | -0.957504284 |
| PHF10     | -1.121464064 | -0.570739022 |
| IGF2BP2   | -1.155806612 | -0.679343221 |
| TMEM255A  | -2.570378971 | -2.989631346 |
| LAMP5     | -0.845916214 | -0.768378707 |
| IRF8      | -0.749492619 | -0.339881248 |
| SATB1     | -0.680088531 | -0.92339395  |
| CXorf21   | -0.598252328 | -0.545910616 |
| SATB2     | -0.679825687 | -0.600778519 |
| SRGN      | -0.553921529 | -0.4168654   |
| FLT3      | -1.056400388 | -0.712988005 |
| CPEB2     | -1.230555823 | -1.809057416 |
| KCNN2     | -0.953083024 | -0.813782437 |
| FOXP1     | -0.750430988 | -0.497603164 |
| TESC      | -0.859177611 | -0.610680802 |
| PBX3      | -0.818842026 | -1.768859435 |
| SDC2      | -0.487149636 | -1.067202025 |
| KLHL23    | -0.816710615 | -0.78709842  |
| MYC       | -0.351530754 | -0.337674731 |
| REEP3     | -0.581024563 | -1.441970132 |
| TERT      | -0.660329416 | -0.324917509 |
| ZNF516    | -0.417680197 | -0.351410952 |
| DLX1      | -0.550081491 | -0.730310543 |
| TFB2M     | -0.409087985 | -0.414146039 |
| SLC25A19  | -0.412433634 | -0.377046677 |
| NANOS1    | -1.193674438 | -0.992017796 |
| FAM120AOS | -0.45521356  | -0.363490026 |
| HSPA4L    | -0.475301018 | -0.441551735 |
| CENPV     | -0.833750069 | -0.586459719 |
| CDK6      | -0.434179181 | -0.457528672 |
| MEIS1     | -0.494833554 | -2.592036446 |
| RRP7A     | -0.340158808 | -0.436506155 |
| DCUN1D5   | -0.362309609 | -0.333435683 |
| DNAJA4    | -0.431822443 | -0.440829487 |
| STARD8    | -0.615129477 | -0.362435997 |
| MRTO4     | -0.355331992 | -0.427786232 |
| BATF3     | -0.851320649 | -0.771901131 |
| MRPS34    | -0.435247545 | -0.362801654 |
| CSPG4     | -0.588121242 | -0.645501735 |
| ST3GAL4   | -0.423082118 | -0.354410615 |
| NDUFAF3   | -0.370546953 | -0.637817861 |
| RPL36AL   | -0.330113755 | -0.384295181 |
| ZEB2      | -0.373498827 | -0.492659654 |
| BAG2      | -0.58136371  | -0.420149031 |
| WDR4      | -0.383034064 | -0.465727625 |
| SFMBT1    | -0.637262679 | -0.345642443 |
| CGREF1    | -0.428232511 | -0.588302825 |
| HS3ST1    | -0.520323269 | -0.941612428 |
| SFXN4     | -0.365622965 | -0.621281327 |
| PLD6      | -0.387615714 | -0.437421361 |

| GeneName   | OCI3_log2 FC | MOLM_log2 FC |
|------------|--------------|--------------|
| PSMG1      | -0.323615833 | -0.424594781 |
| AGMAT      | -0.689972746 | -0.333246665 |
| TEAD4      | -0.363515217 | -0.333273264 |
| NOP16      | -0.333407476 | -0.340139849 |
| ZBTB33     | -0.323060432 | -0.606023325 |
| CMTM7      | -0.418332454 | -0.53578187  |
| PIWIL4     | -0.458460044 | -0.450316448 |
| LHX6       | -0.602949475 | -0.506947065 |
| GAREM2     | -0.471599636 | -0.418863173 |
| TIFAB      | -1.283306613 | -0.671791898 |
| IL15RA     | -0.485748542 | -0.446254007 |
| CSPG5      | -0.580692098 | -1.920972963 |
| EGR1       | -0.356252851 | -1.346300897 |
| AVEN       | -0.473762414 | -0.33768645  |
| LRFN1      | -0.389552782 | -0.369222456 |
| CHST10     | -0.325282393 | -0.360801176 |
| SAP30      | -0.436849801 | -0.44226863  |
| QPRT       | -0.569628604 | -0.504319731 |
| RAB33A     | -0.624997086 | -0.422864464 |
| MYO6       | -0.33596582  | -2.777965996 |
| BEND3      | -0.409590254 | -0.411459062 |
| AP1S3      | -0.622053183 | -0.397109917 |
| CHRM4      | -0.801624196 | -4.094642204 |
| PPP1R27    | -0.606765019 | -0.872440061 |
| RHOBTB3    | -0.351258823 | -0.414934525 |
| C16orf91   | -0.323351116 | -0.349866938 |
| IGFBP7     | -0.39575928  | -0.369522524 |
| RNF157     | -0.44924468  | -0.352607549 |
| FAM89A     | -0.447227041 | -0.519579501 |
| FAM127C    | -0.364217964 | -0.379933983 |
| KCNQ4      | -0.828723286 | -0.708966915 |
| RGS9BP     | -0.670167973 | -1.04644981  |
| TBC1D30    | -0.759982571 | -1.106274122 |
| SOCS2      | -0.896893553 | -2.410567303 |
| HACD1      | -0.519382061 | -0.463960157 |
| MRPS28     | -0.331196482 | -0.522708566 |
| SHOX2      | -0.496676938 | -1.594606875 |
| PPP1R3G    | -0.559960037 | -0.629169284 |
| PROK2      | -1.527030596 | -0.542269701 |
| CABLES1    | -0.459216227 | -0.5528942   |
| TOMM5      | -0.366123264 | -0.533577587 |
| GAL        | -0.454234218 | -0.473886456 |
| ITPRIPL1   | -0.337822683 | -0.488668089 |
| GET4       | -0.756694731 | -0.454602228 |
| EMID1      | -0.394457229 | -0.629347219 |
| TXNDC5     | -0.530907719 | -0.53845581  |
| DLX2       | -0.470491862 | -0.985056205 |
| GADD45GIP1 | -0.339853646 | -0.3401186   |
| FAM174B    | -0.578203186 | -0.4703284   |

Figure S5

**A****MLL-AF9 + FLT3-TKD AML cells  
500 nM SNDX/Control**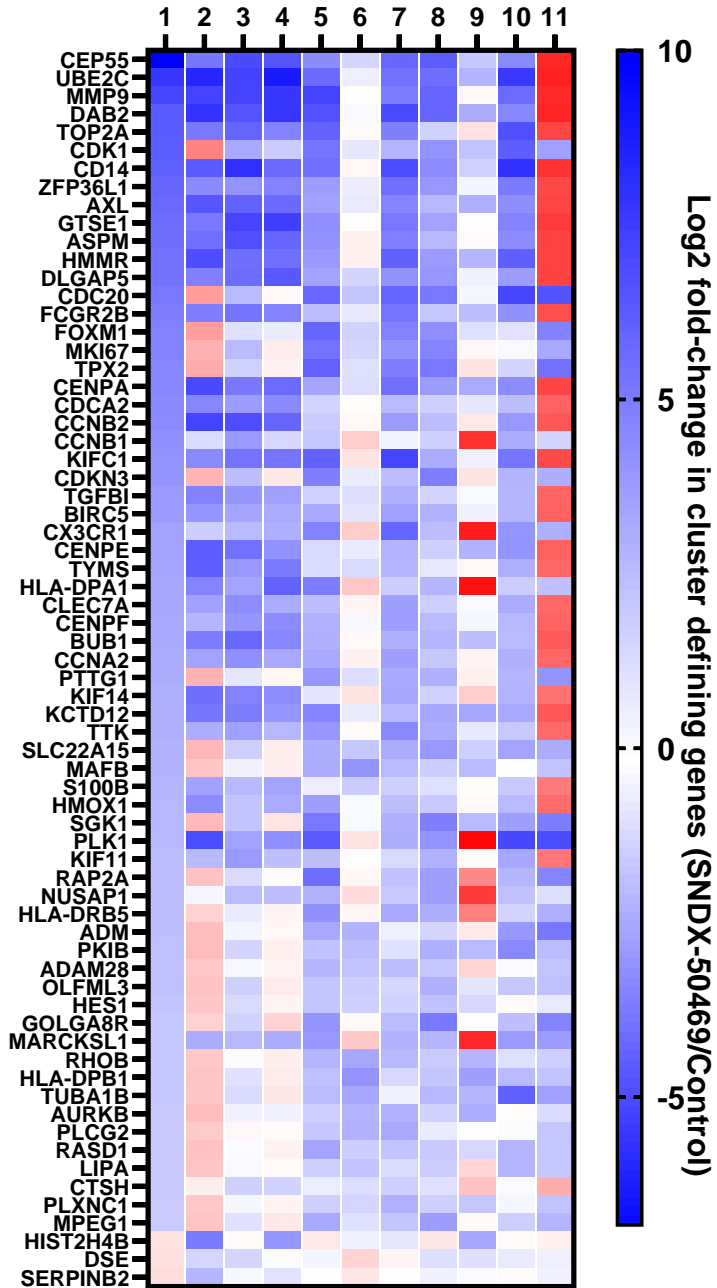**Figure S6**

**B****MLL-AF9 + FLT3-TKD AML cells**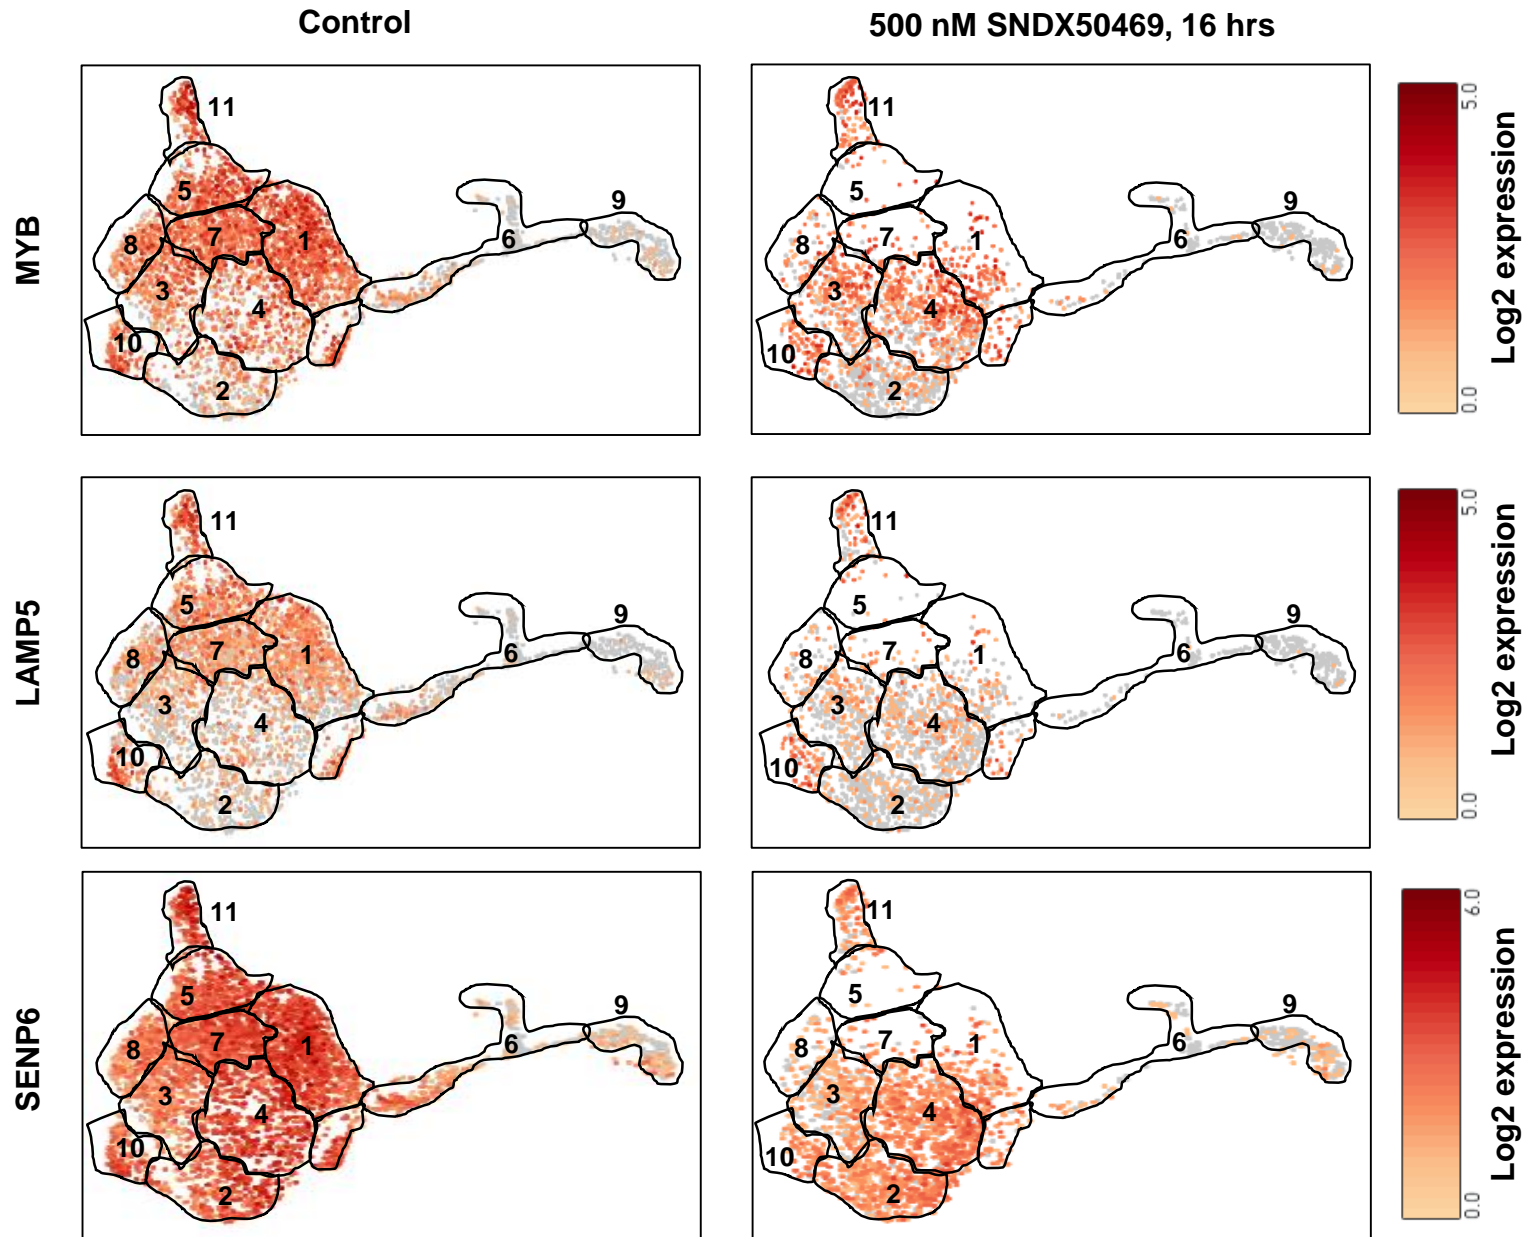**Figure S6**

MLL-AF9 + FLT3-TKD AML cells

B

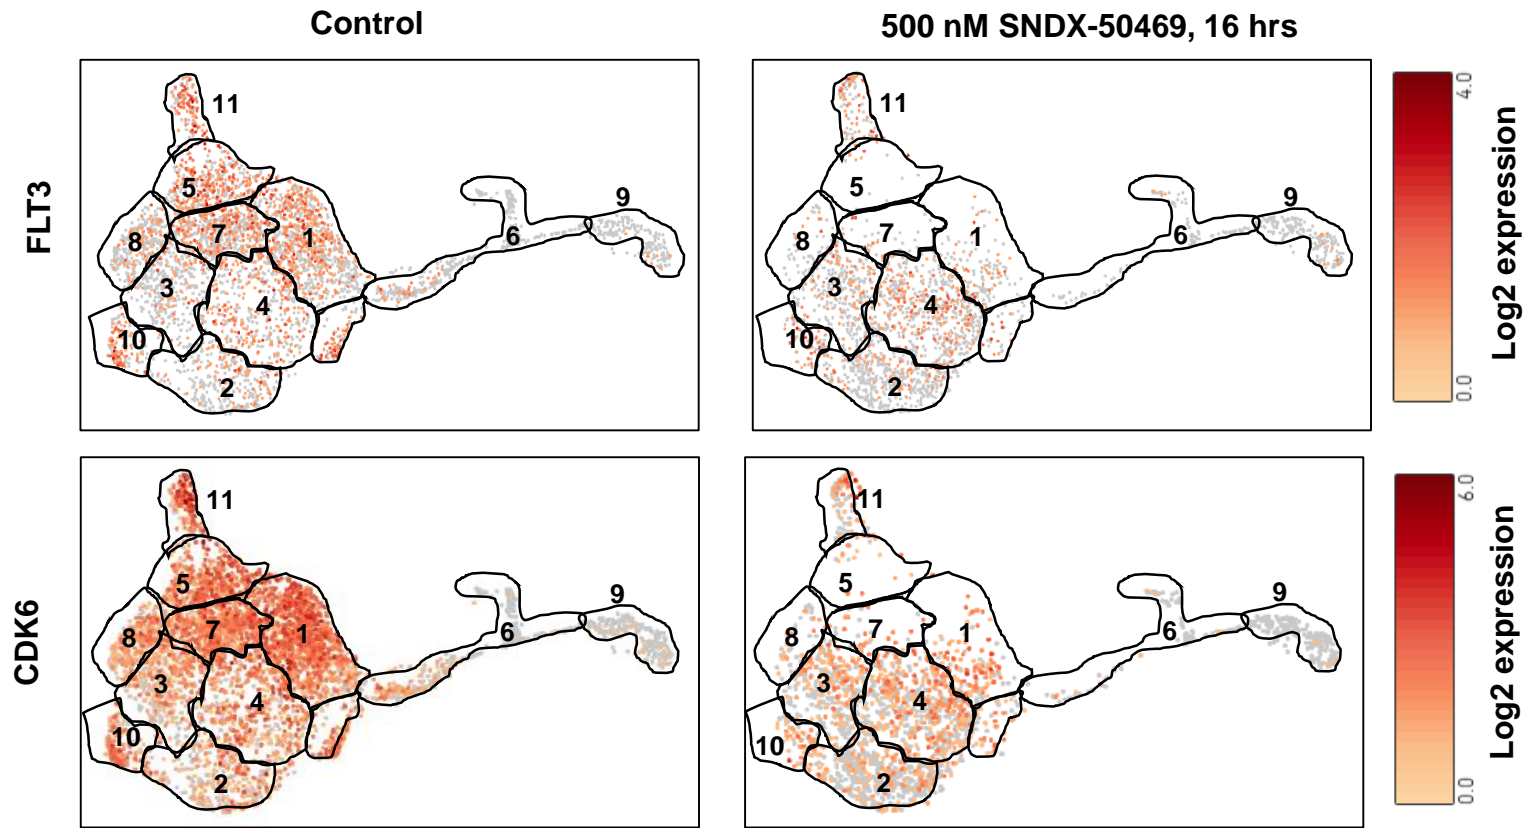

Figure S6

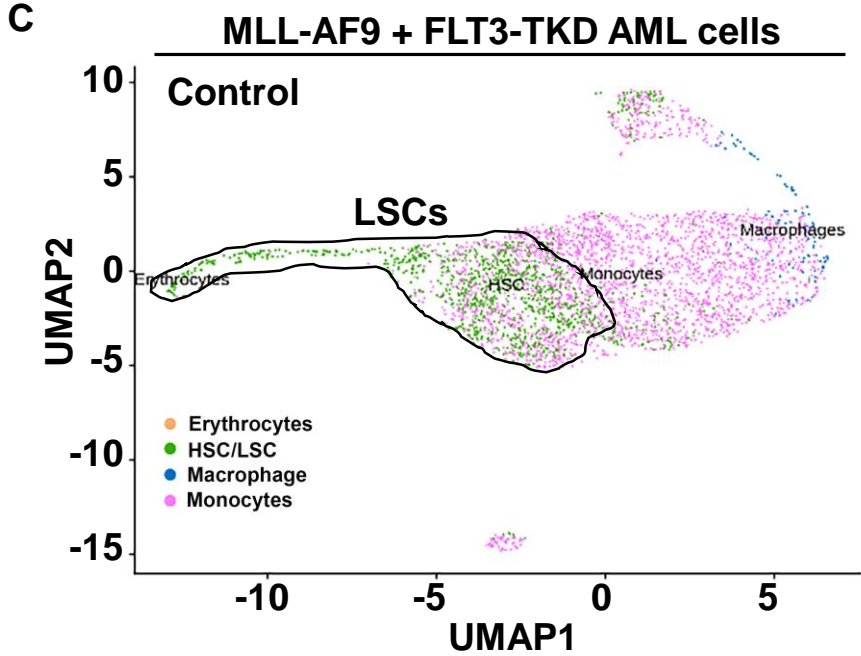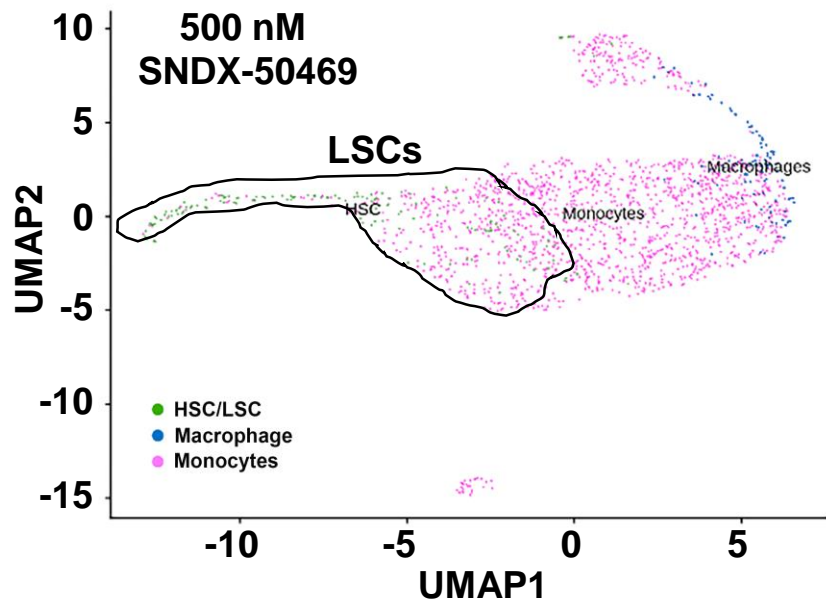

SNDX-50469 treatment decreases the # of cells with an HSC/LSC mRNA signature.

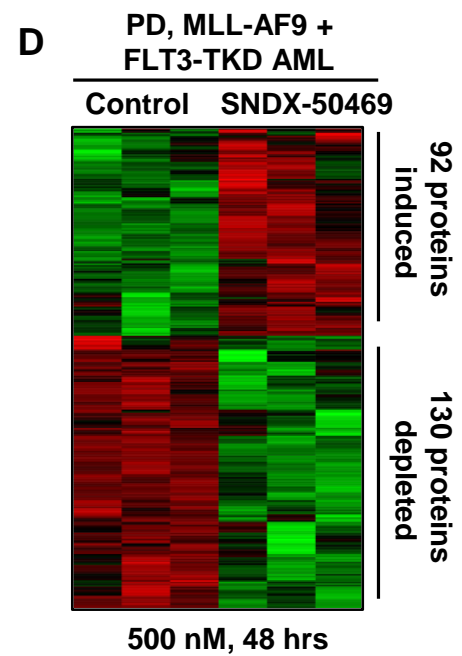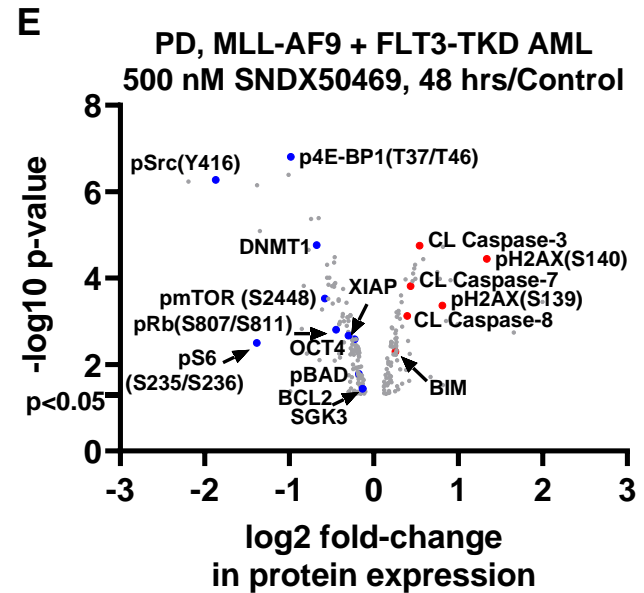

Figure S6

**A** MOLM13  
Day 12/Day 2 Control

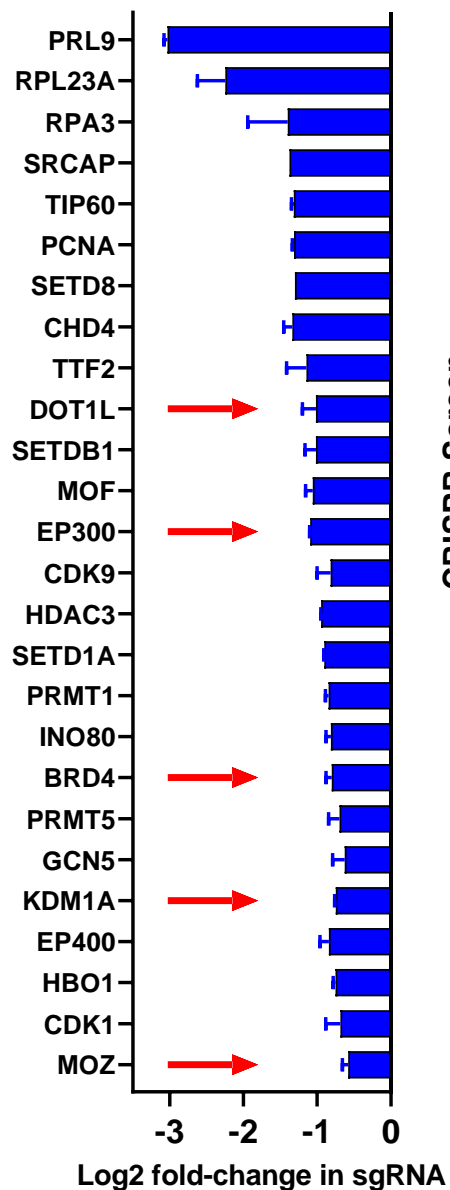

**B** MV4-11  
Day12/Day 2 Control

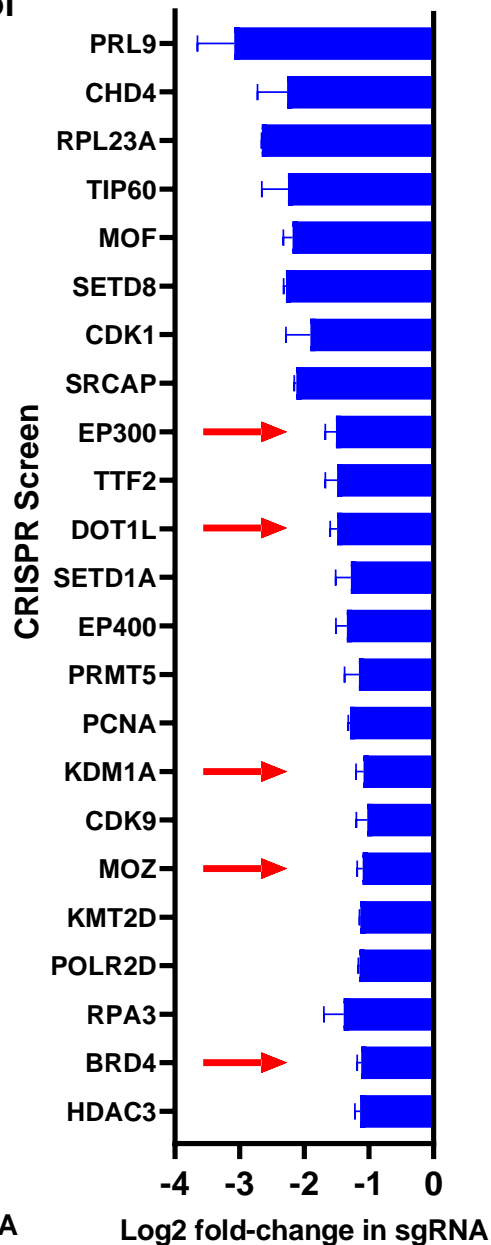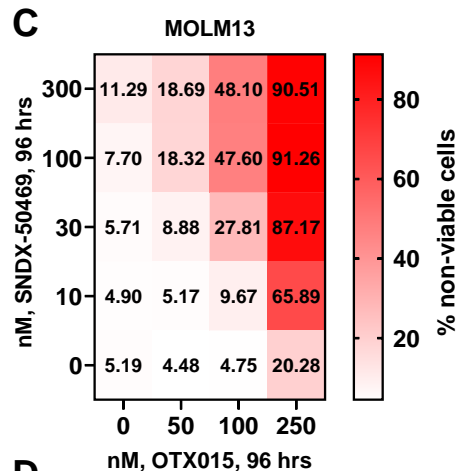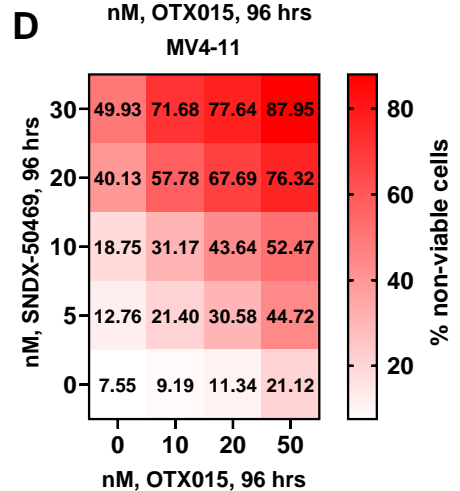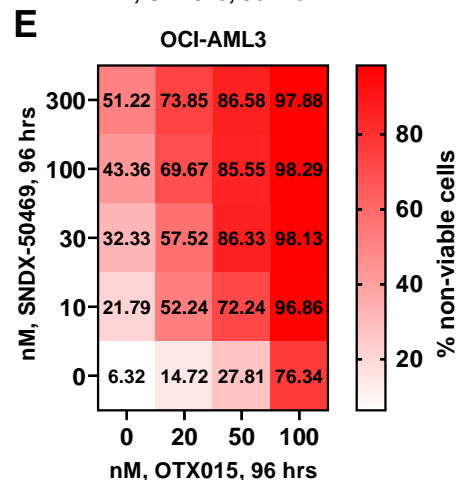

Figure S7

**F**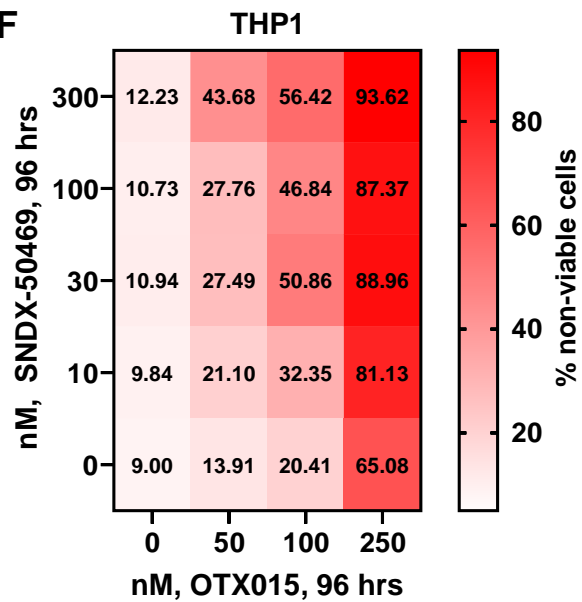**G**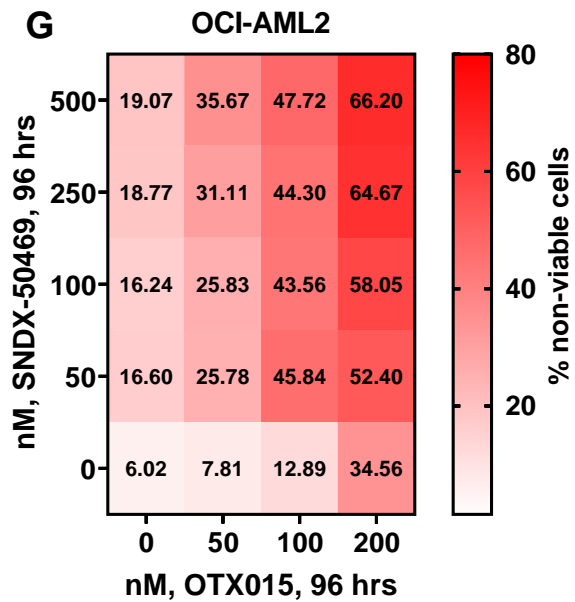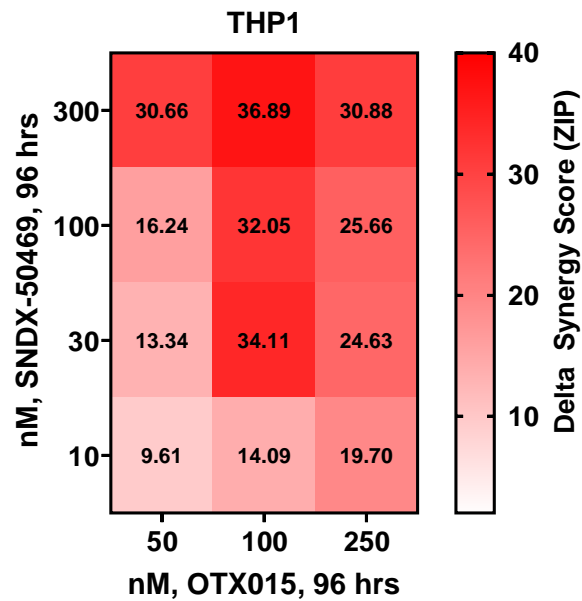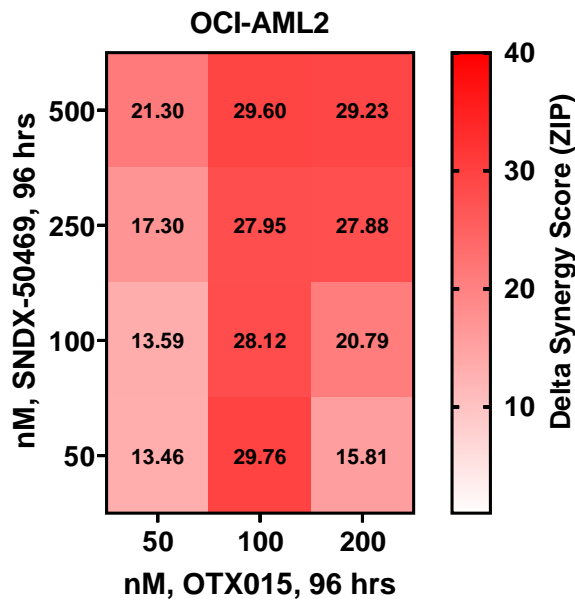**Figure S7**

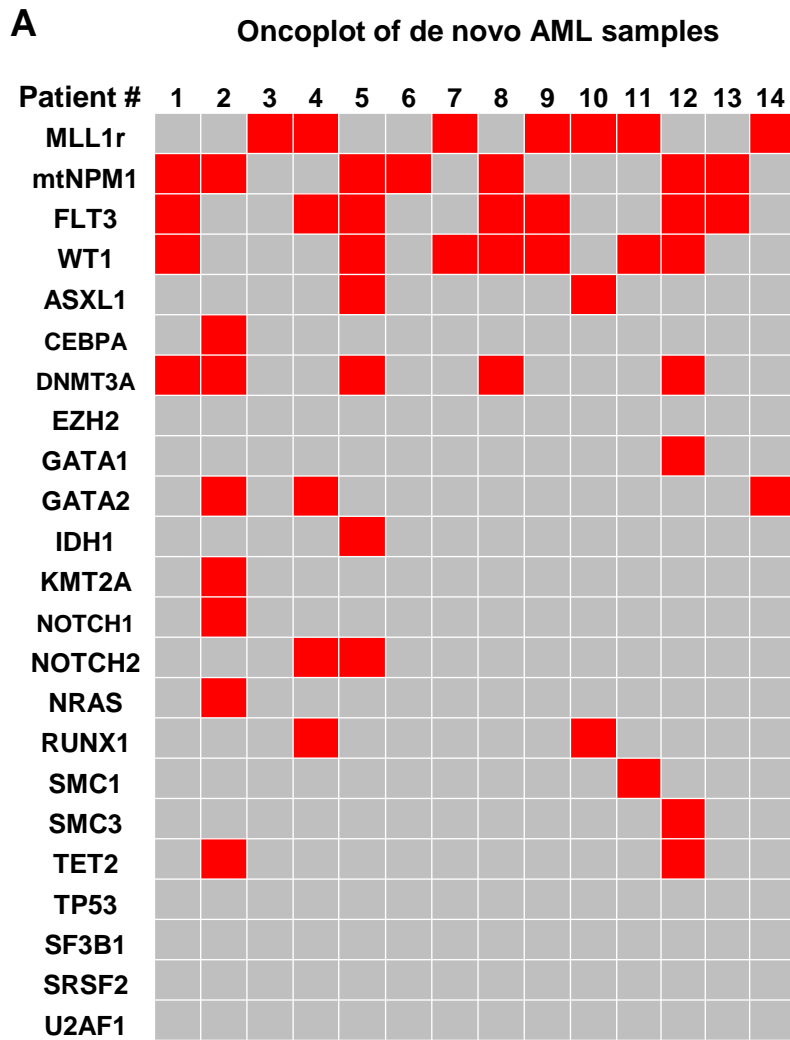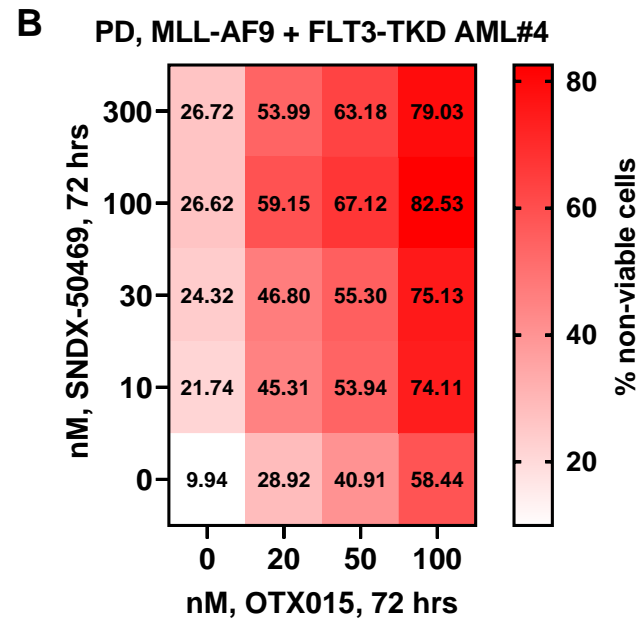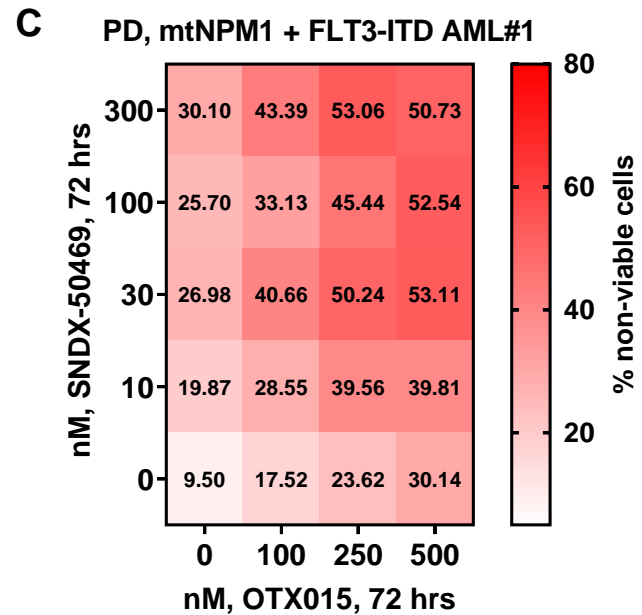

Figure S8



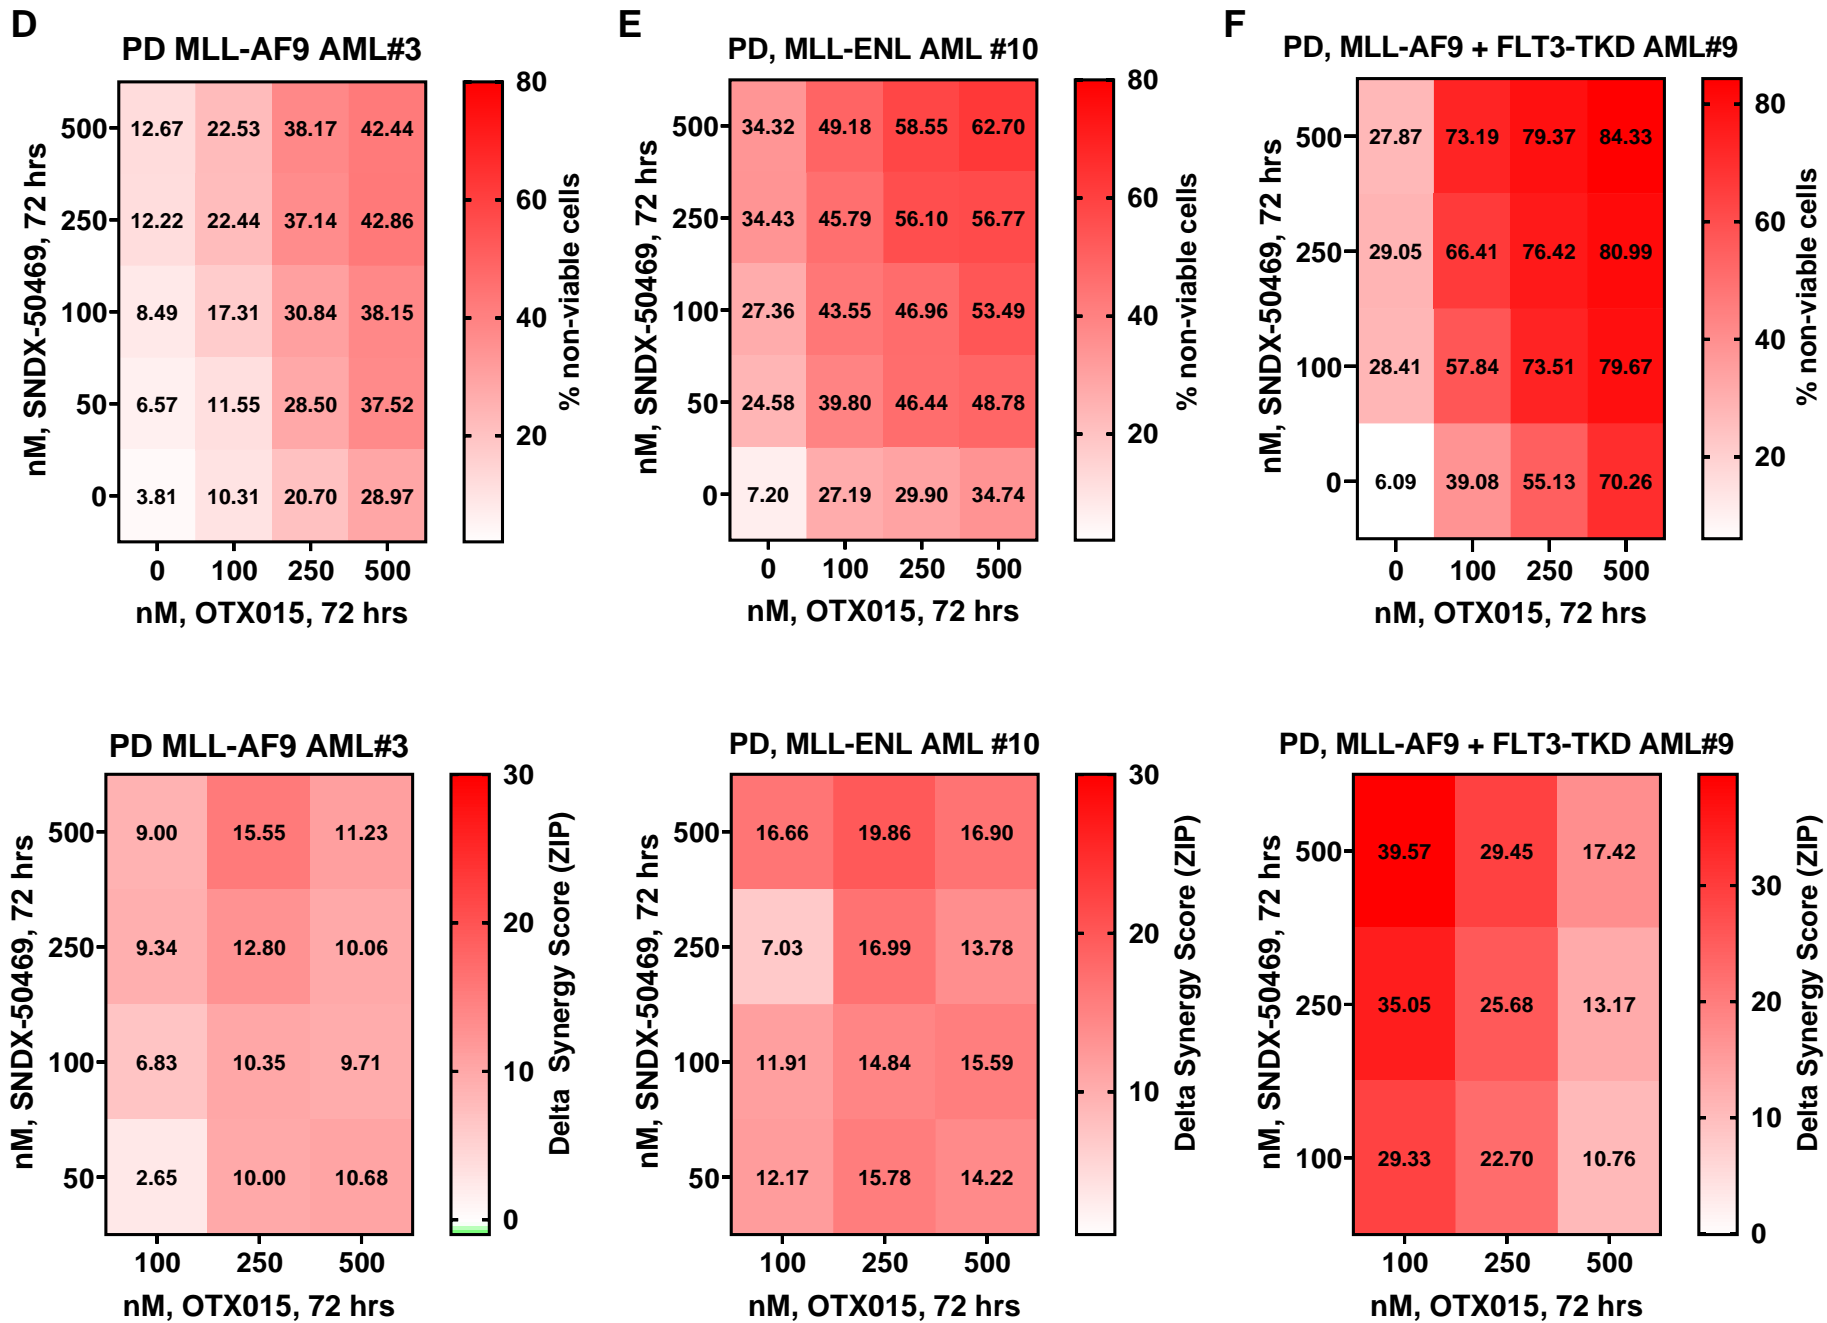

Figure S8

**G**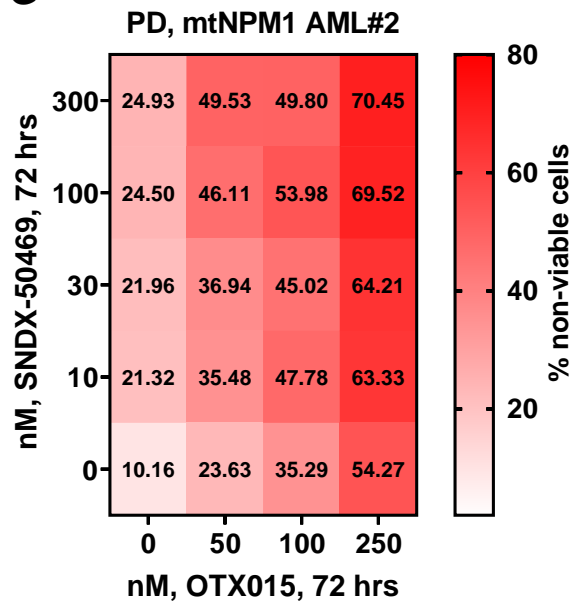**H**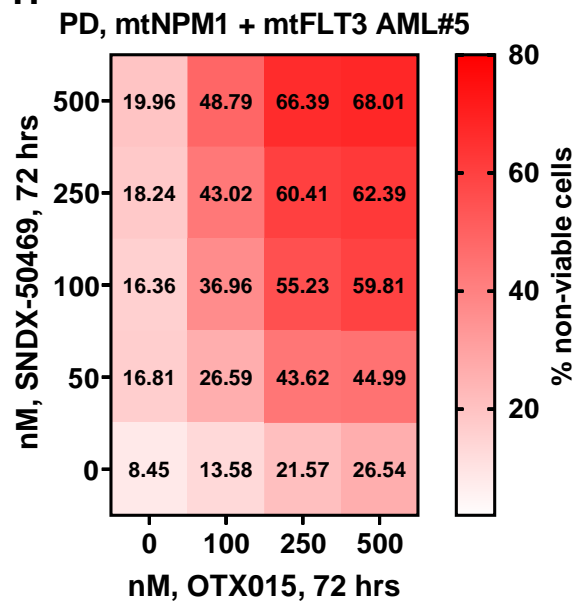**I**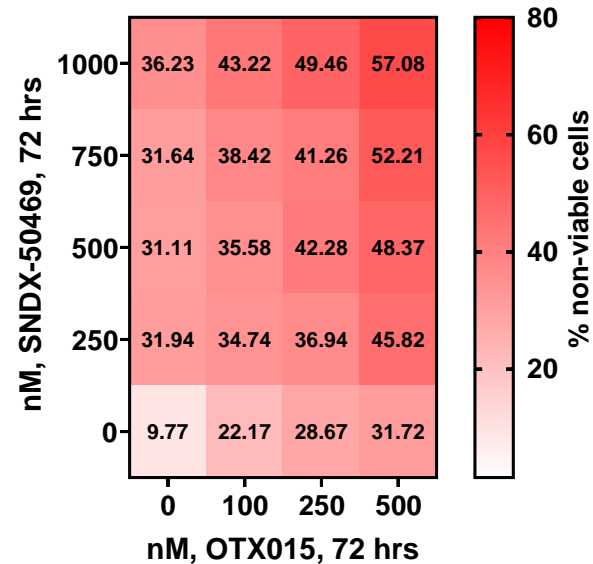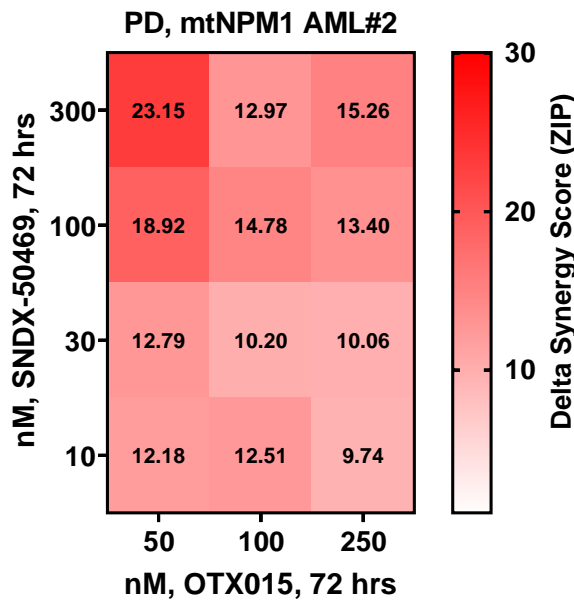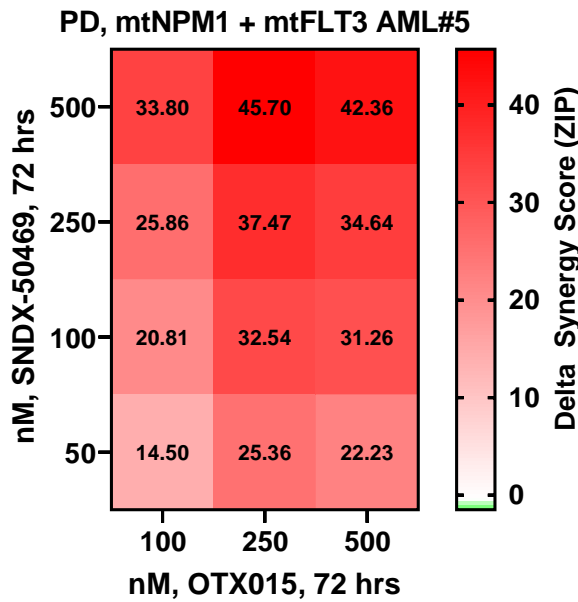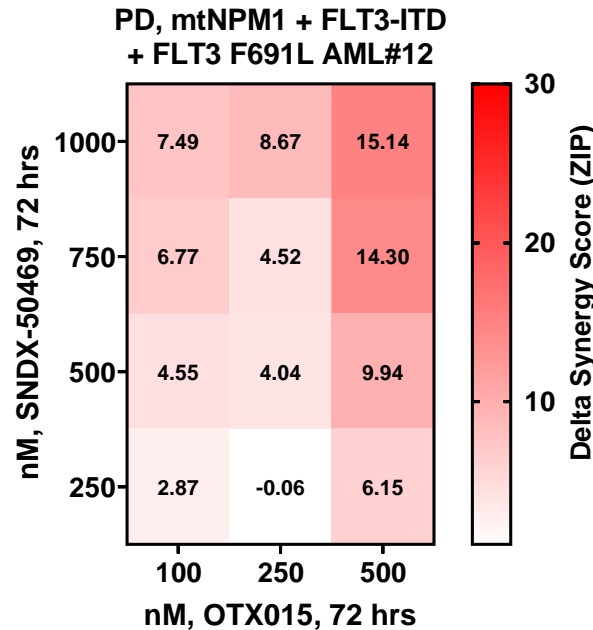**Figure S8**

**J****SNDX-50469 and OTX015**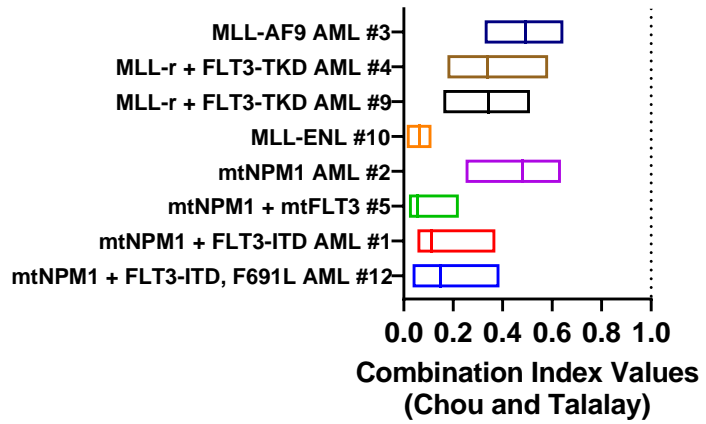

**A****MV4-11**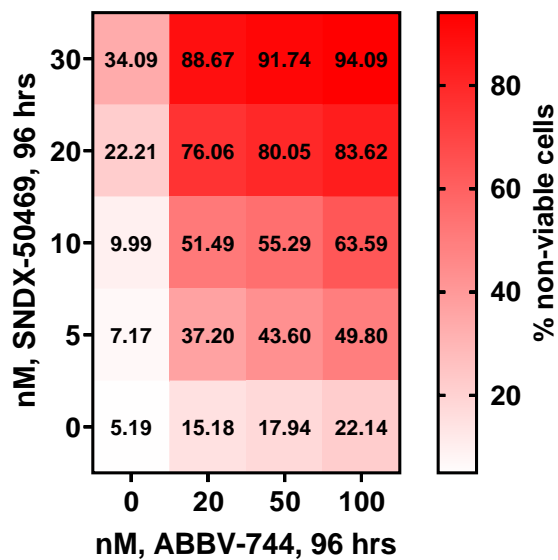**B****MOLM13**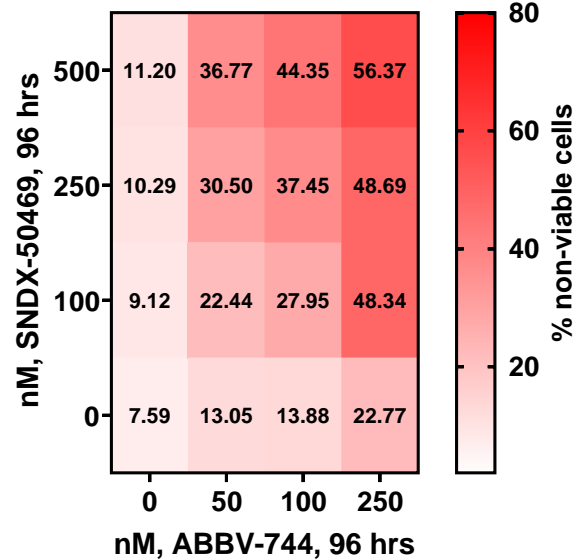**C****OCI-AML3**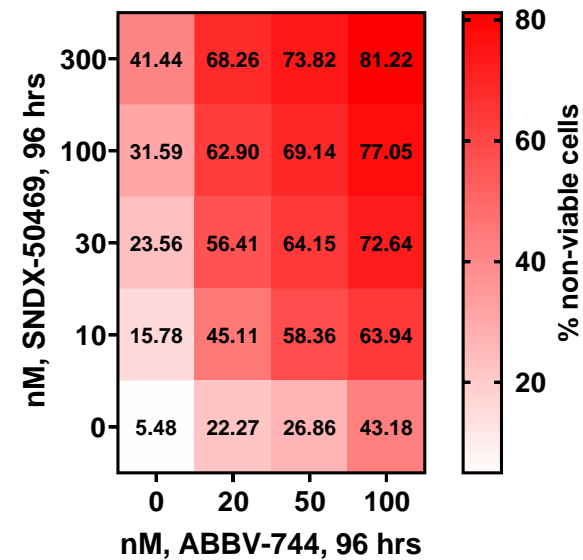**Figure S9**

**A** MOLM13 TP53-R175H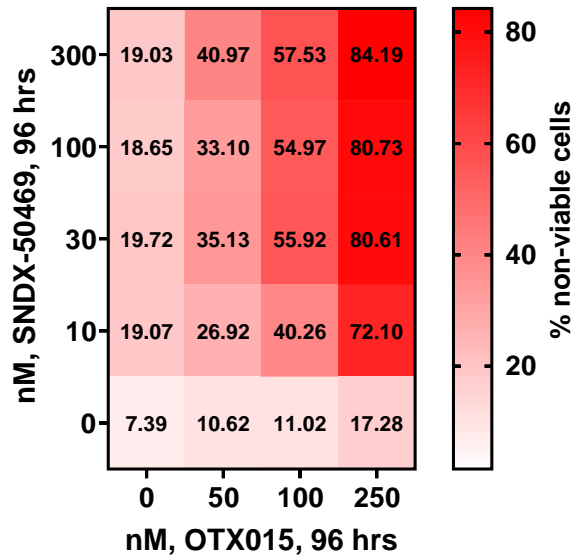**B** MOLM13 TP53-R248Q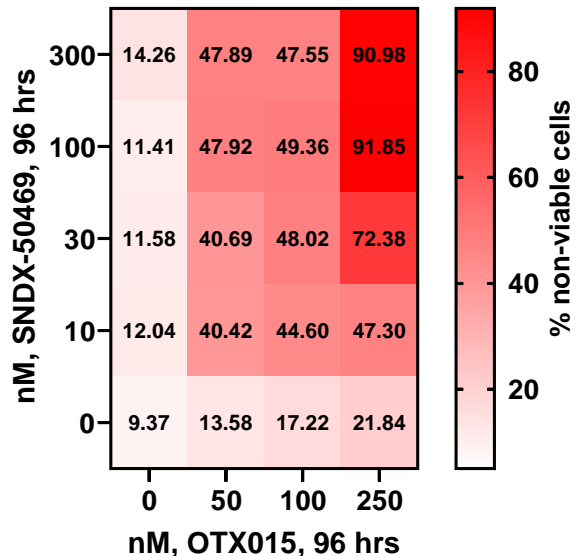

MOLM13 TP53-R175H

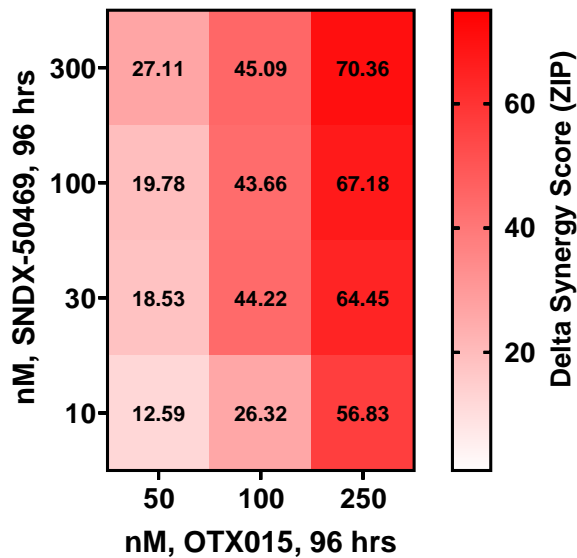

MOLM13 TP53-R248Q

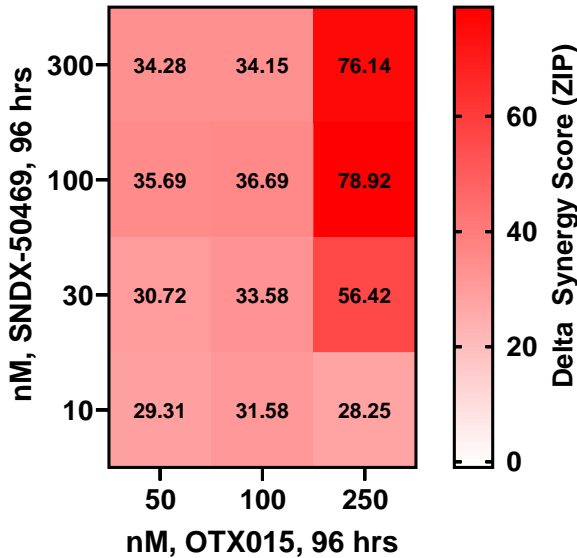

**C****MOLM13 TP53-R175H**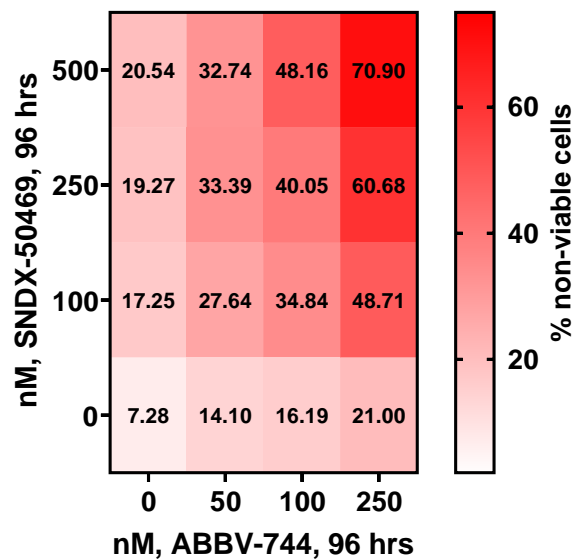**D****MOLM13 TP53-R248Q**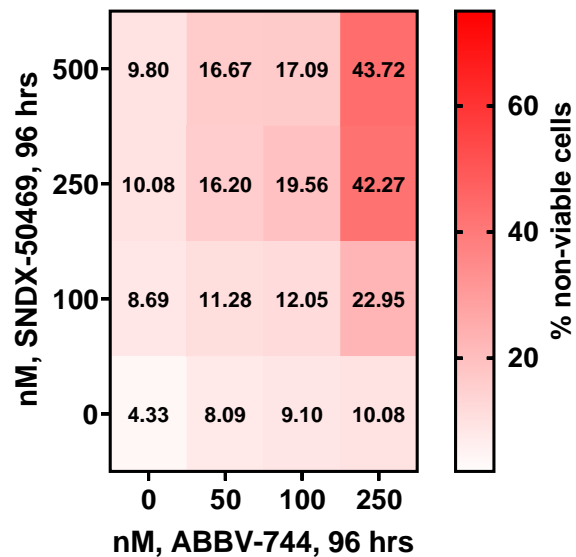**MOLM13 TP53-R175H**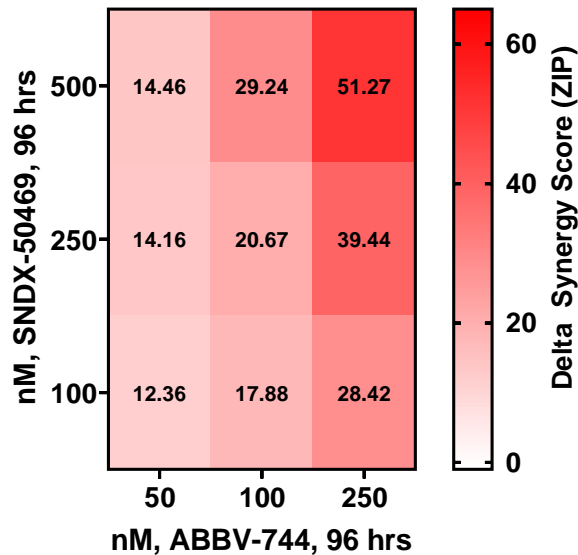**MOLM13 TP53-R248Q**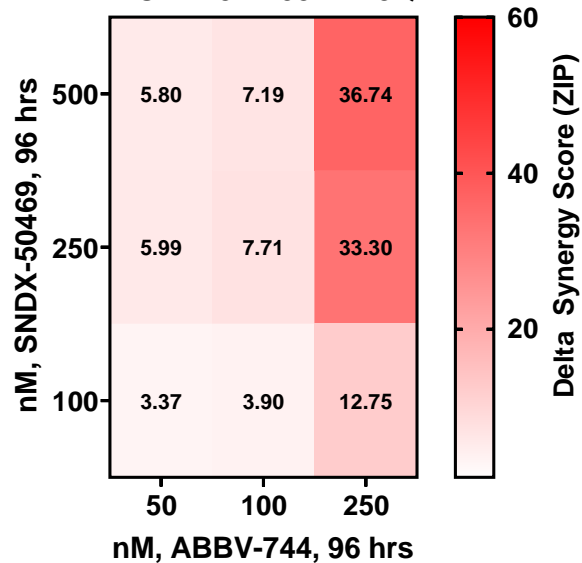

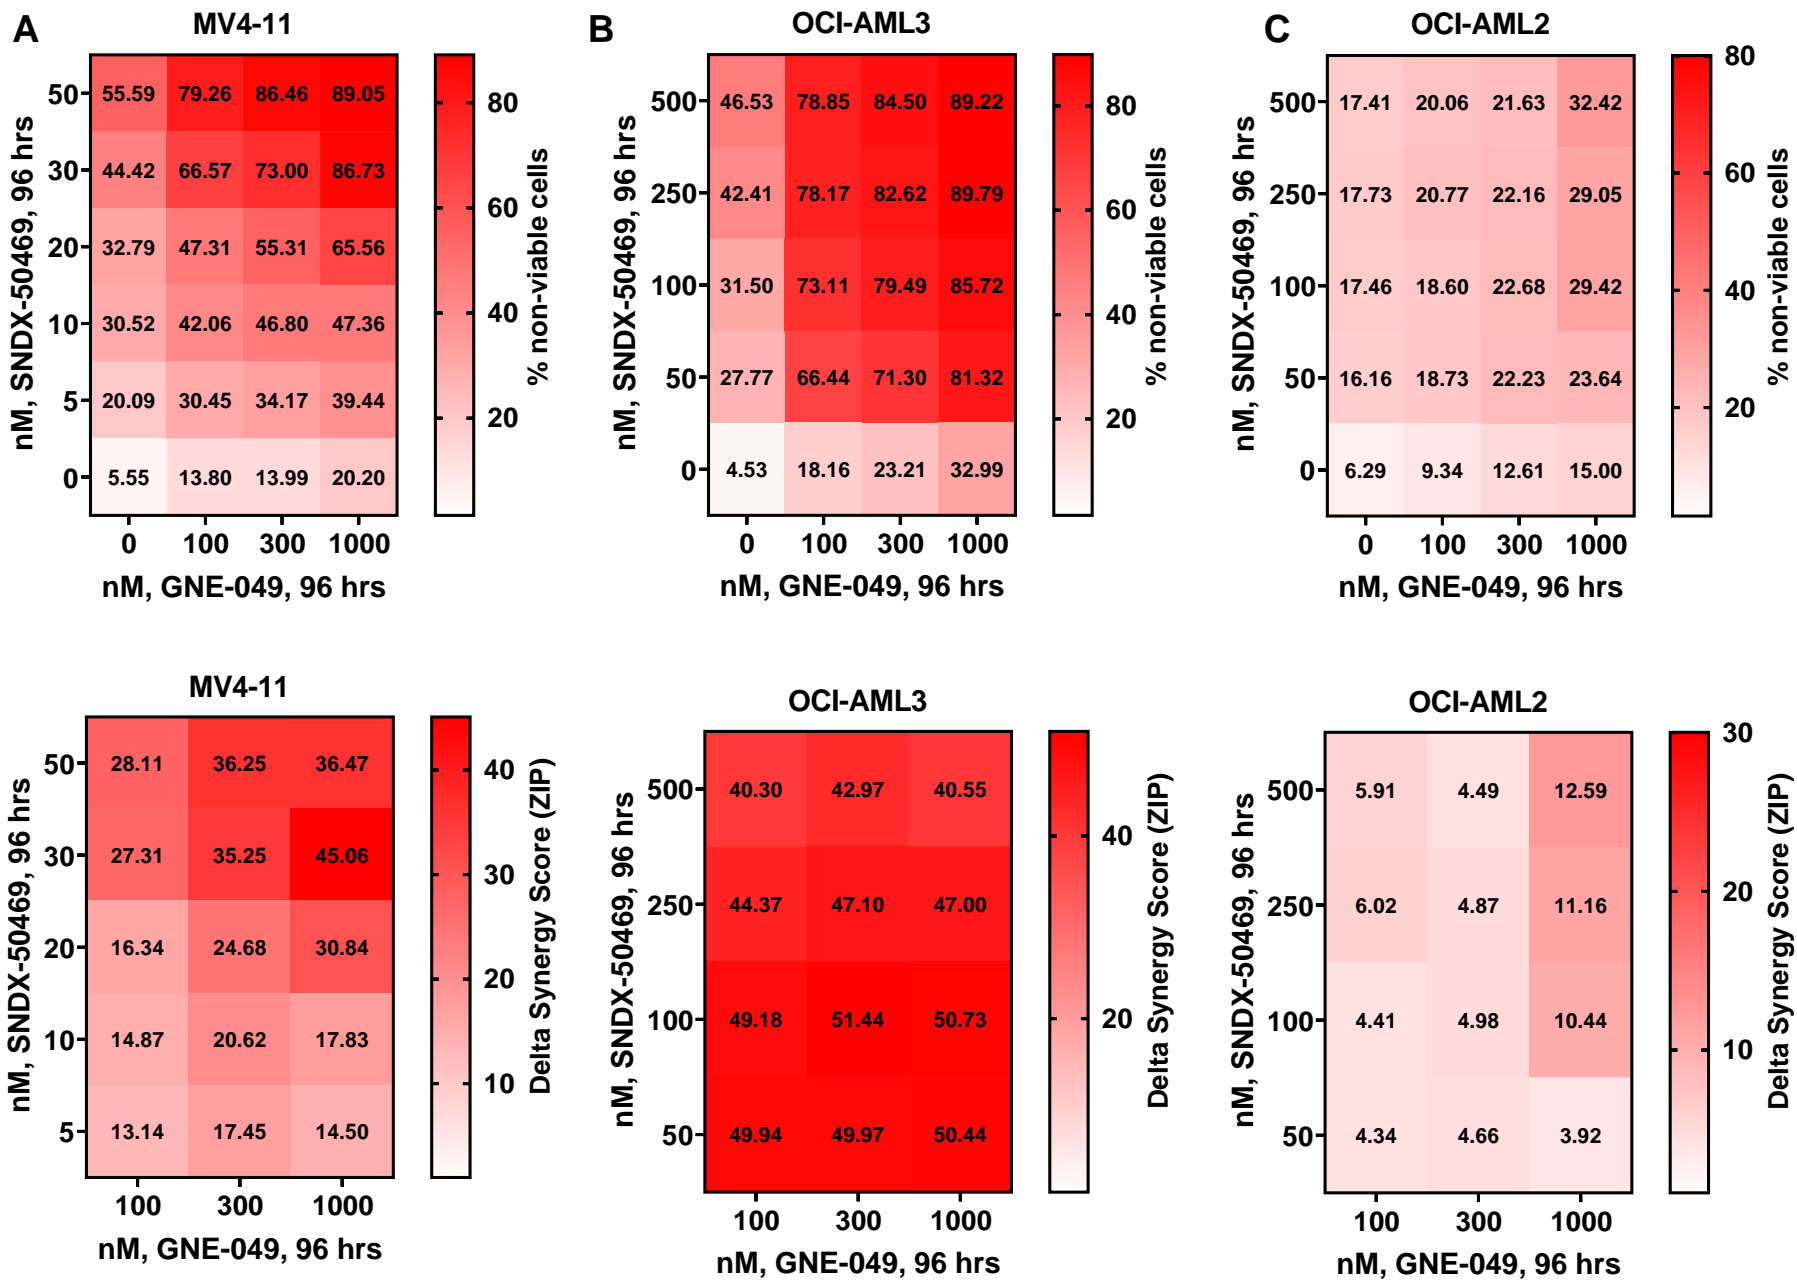

Figure S11

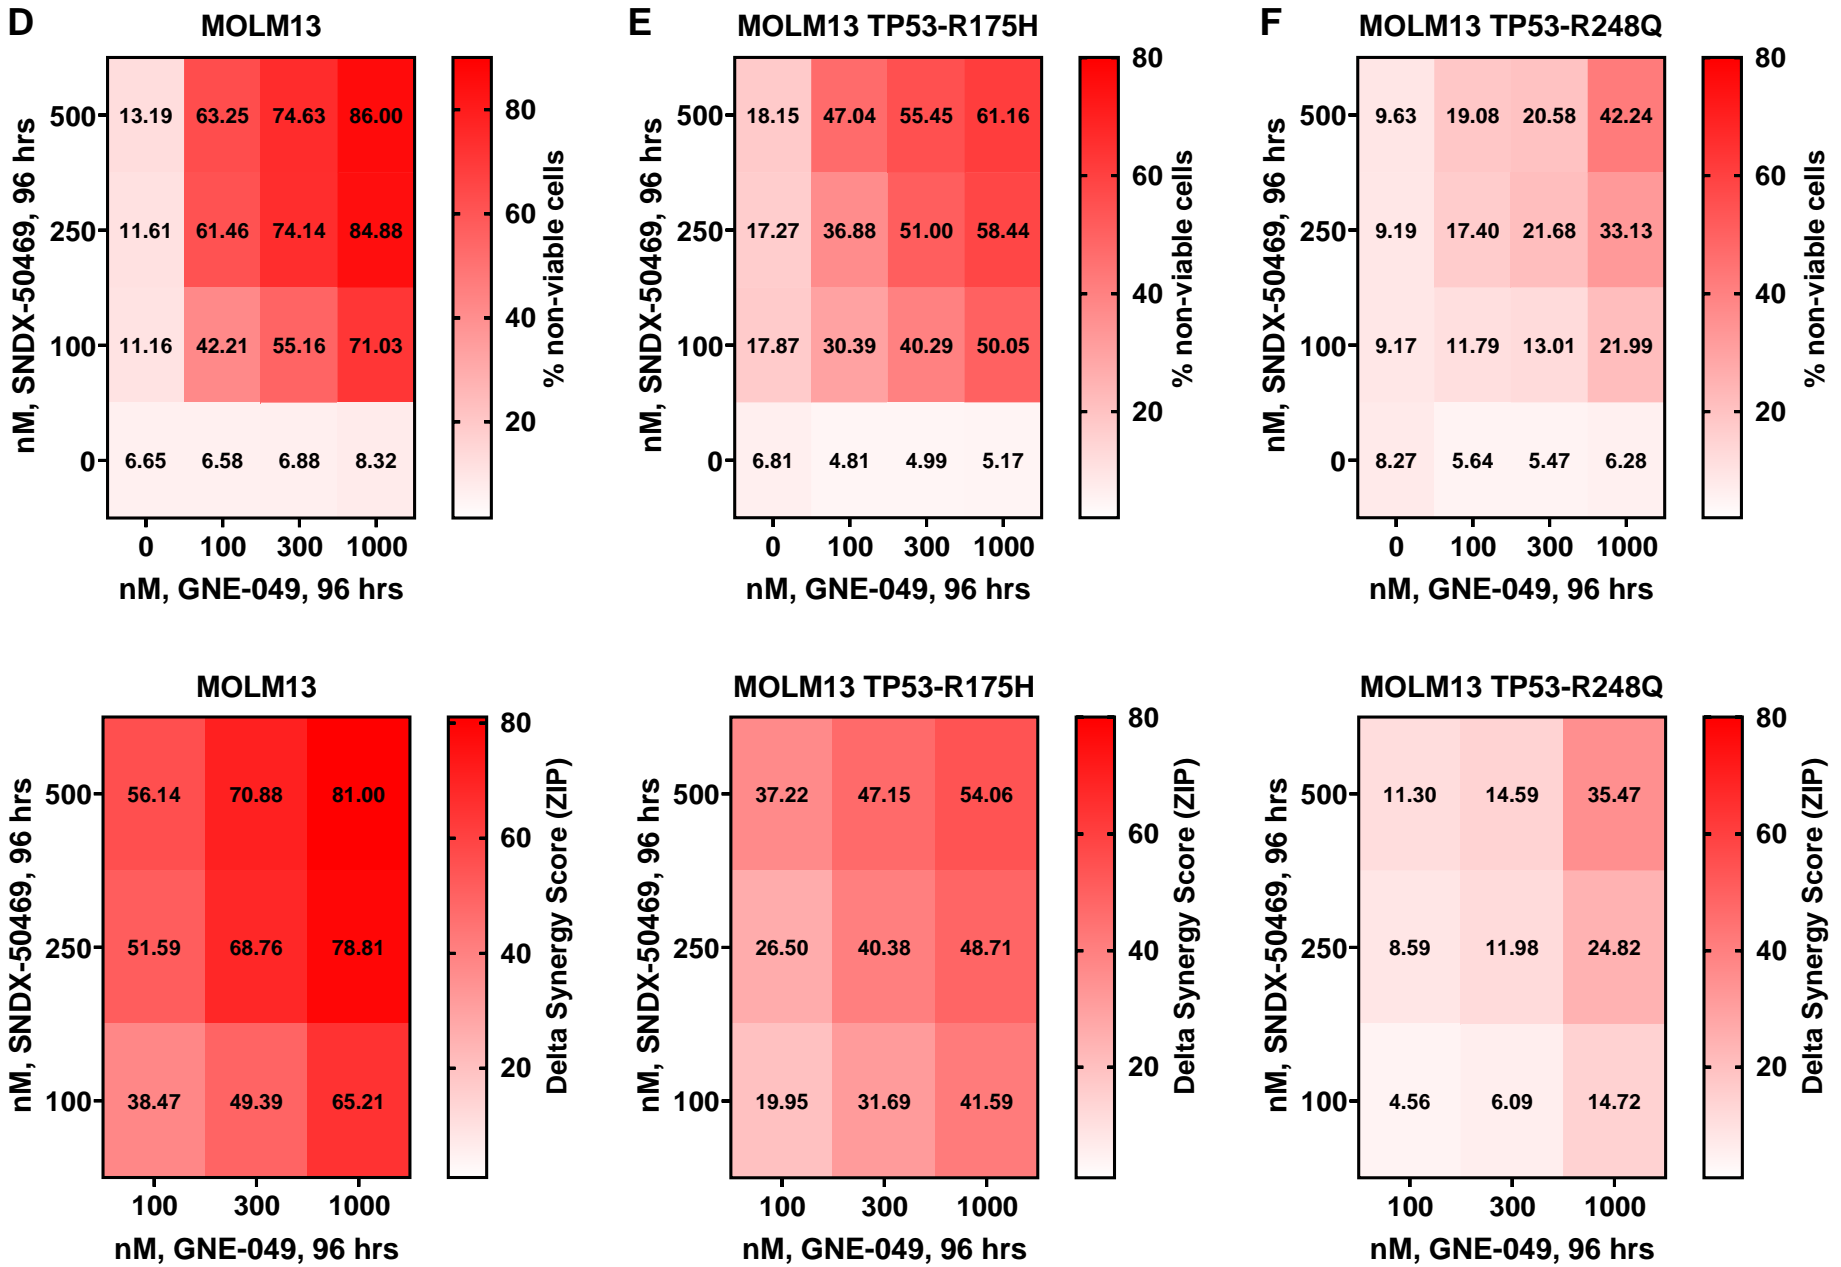

Figure S11



**G** PD MLL-AF9 AML #3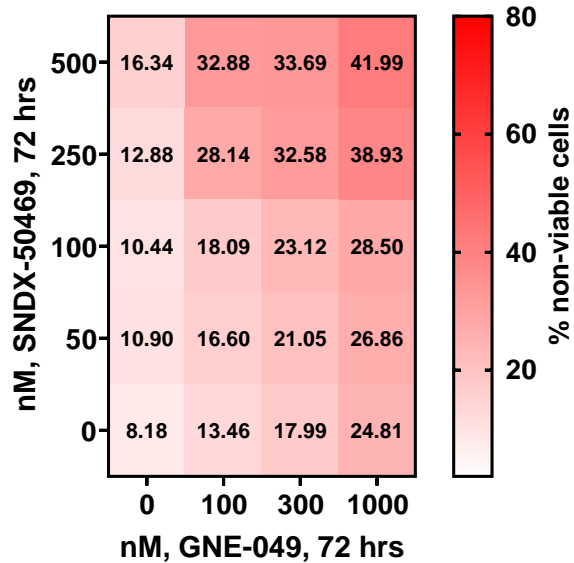**H** PD MLL-AF9 + FLT3-TKD AML#4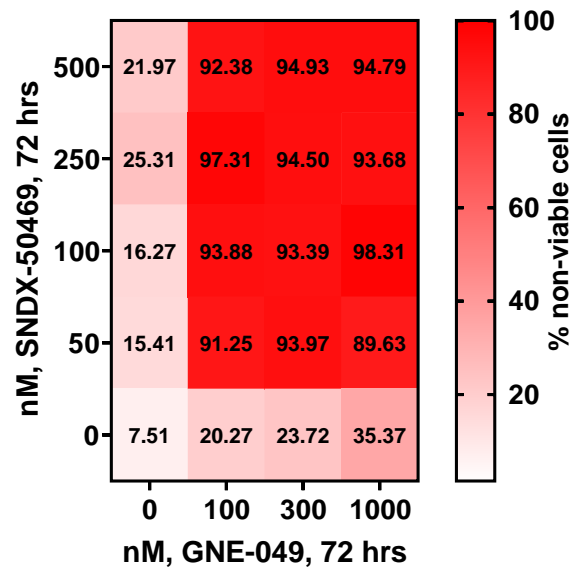

PD MLL-AF9 AML#3

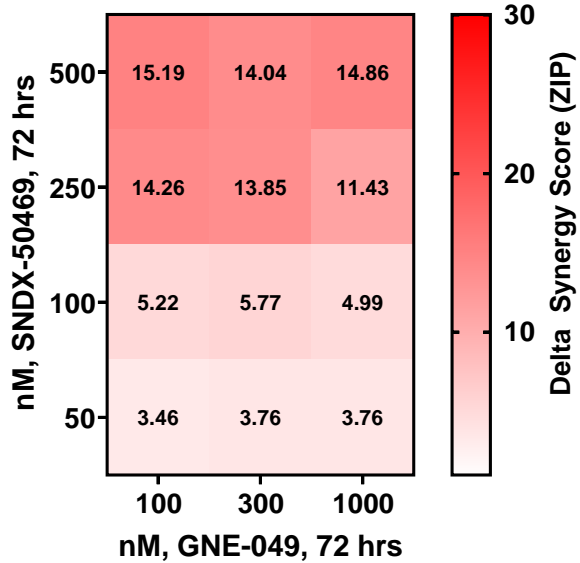

PD MLL-AF9 + FLT3-TKD AML#4

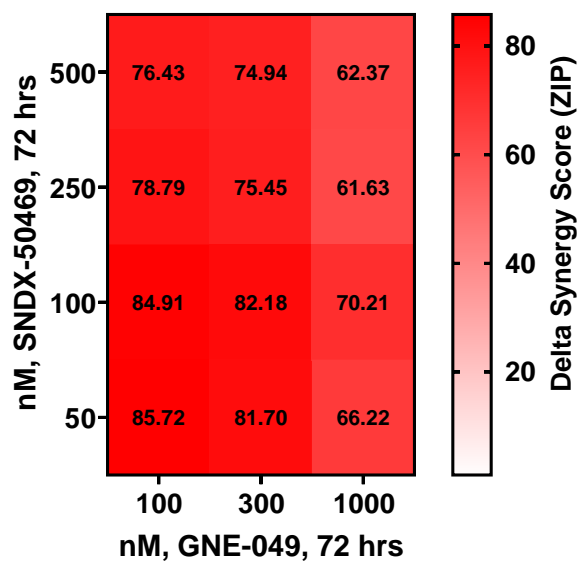

**I** PD mtNPM1 + FLT3-ITD + F691L AML#12

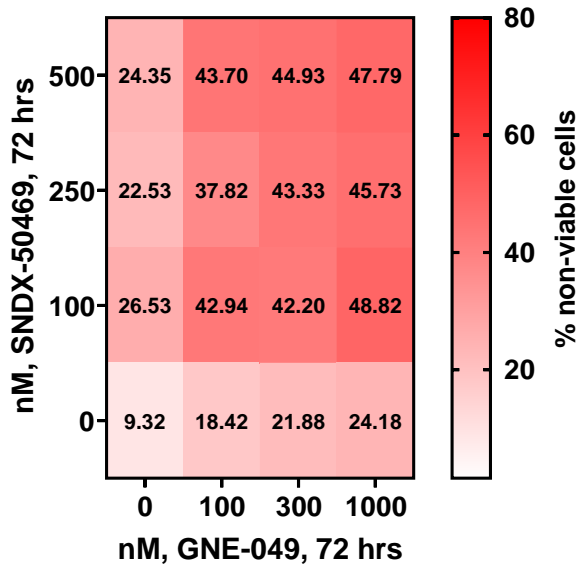

**J**

PD mtNPM1 + FLT3-ITD AML#13

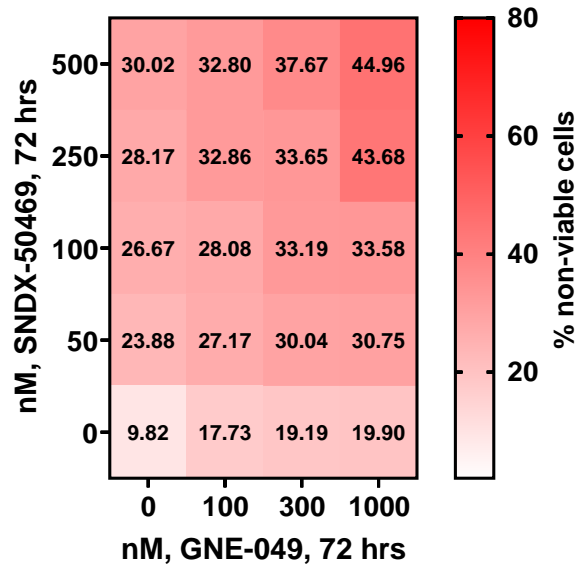

**K**

SNDX-50469 and GNE-049

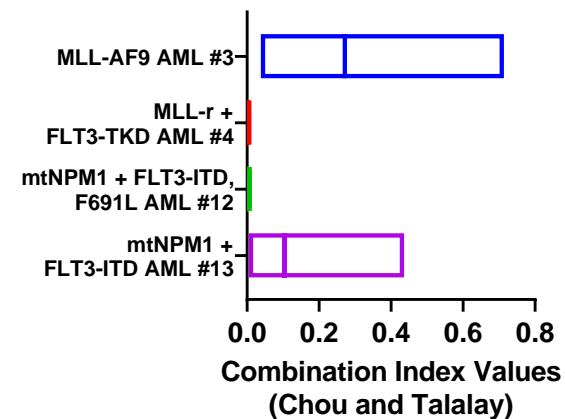

PD mtNPM1 + FLT3-ITD + F691L AML#12

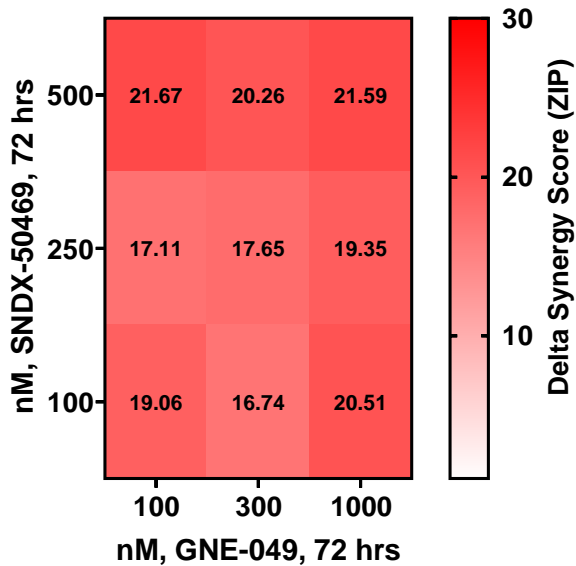

PD mtNPM1 + FLT3-ITD AML#13

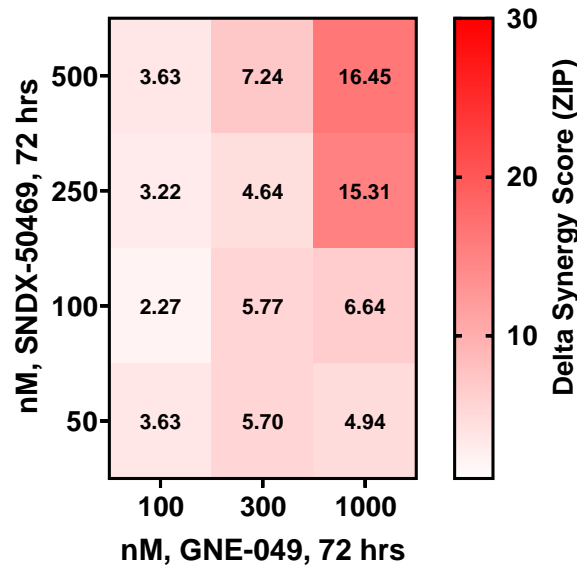

Figure S11

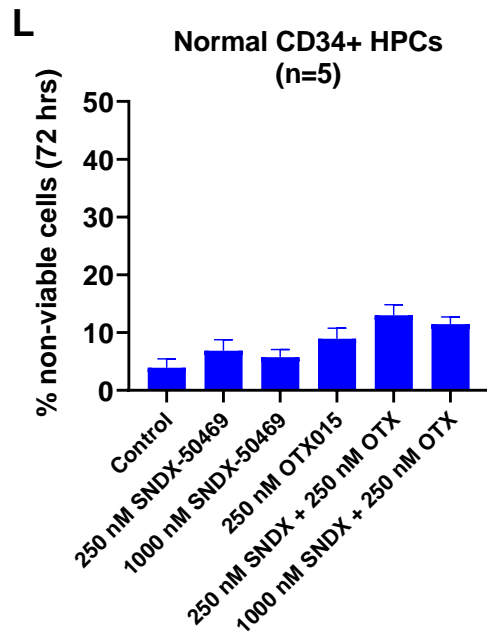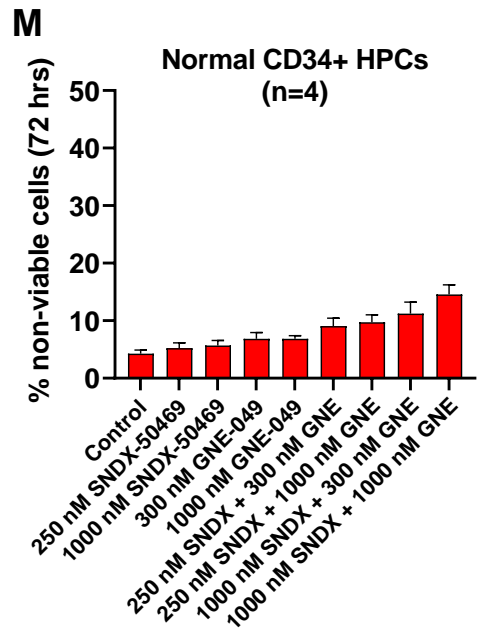

Figure S11

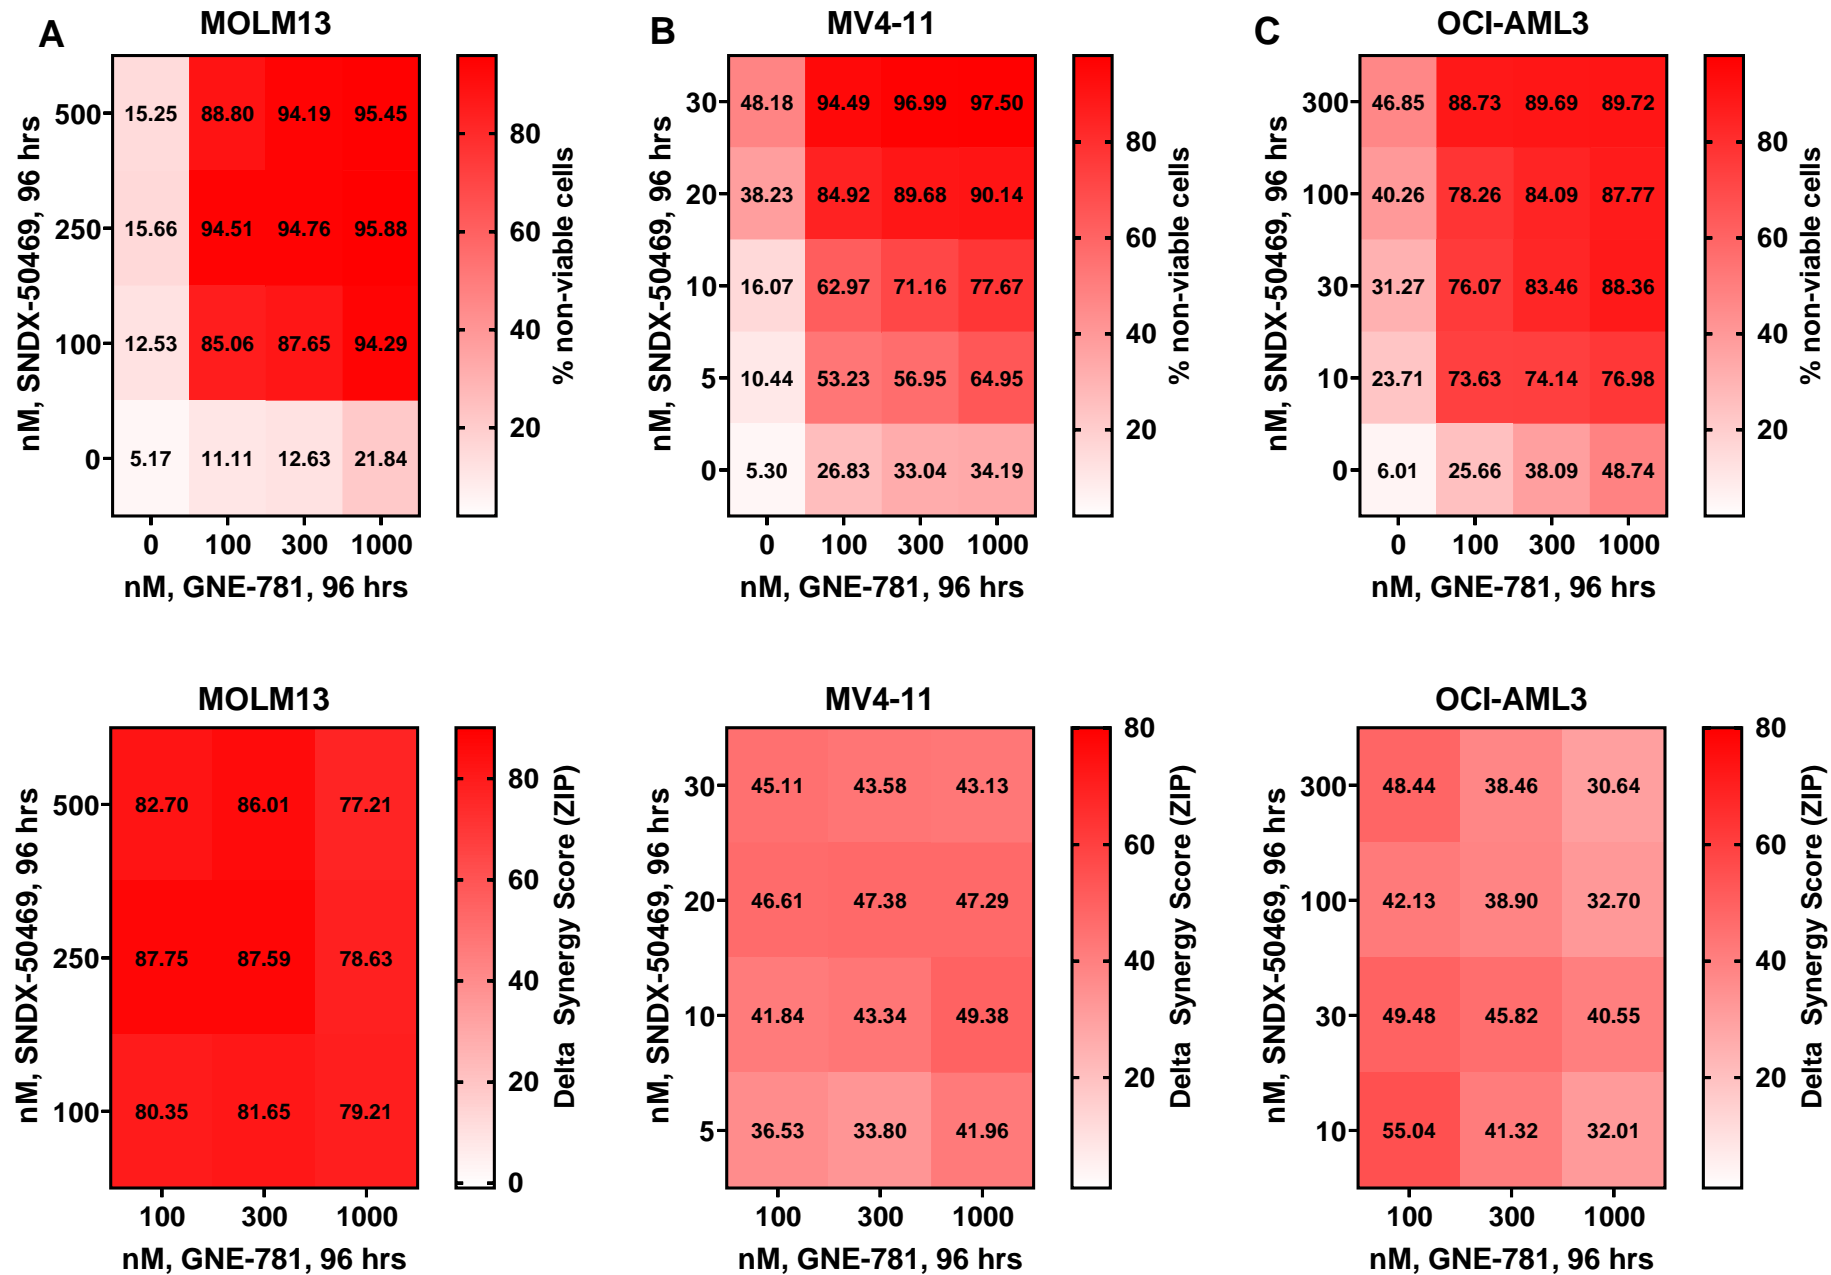

Figure S12

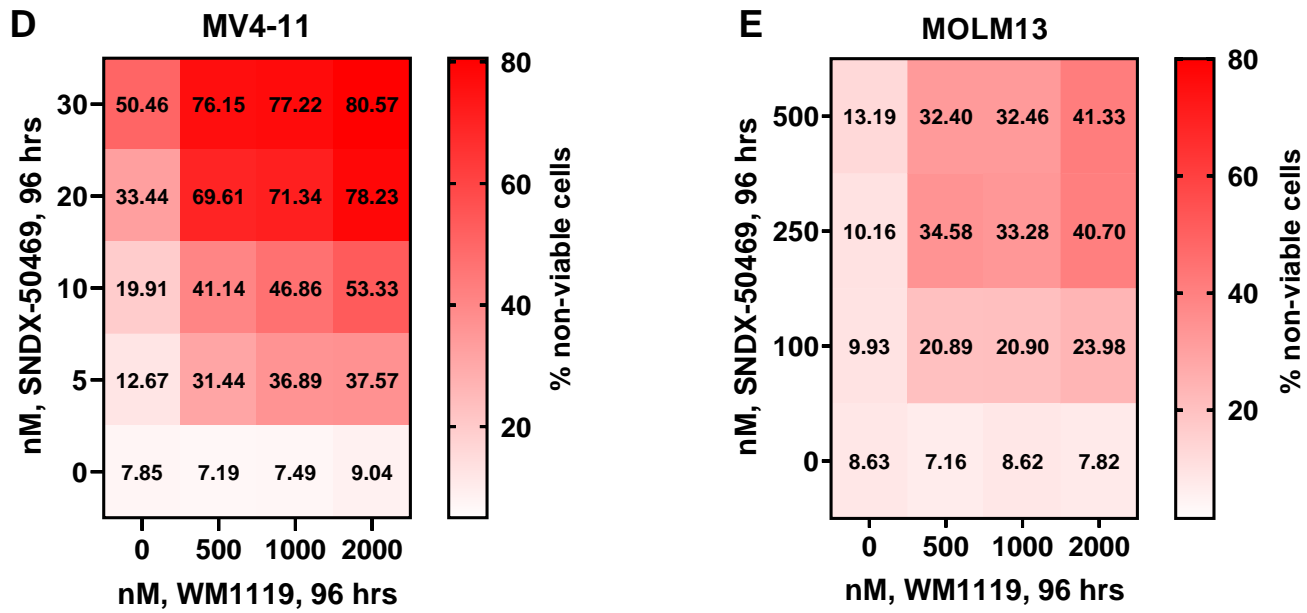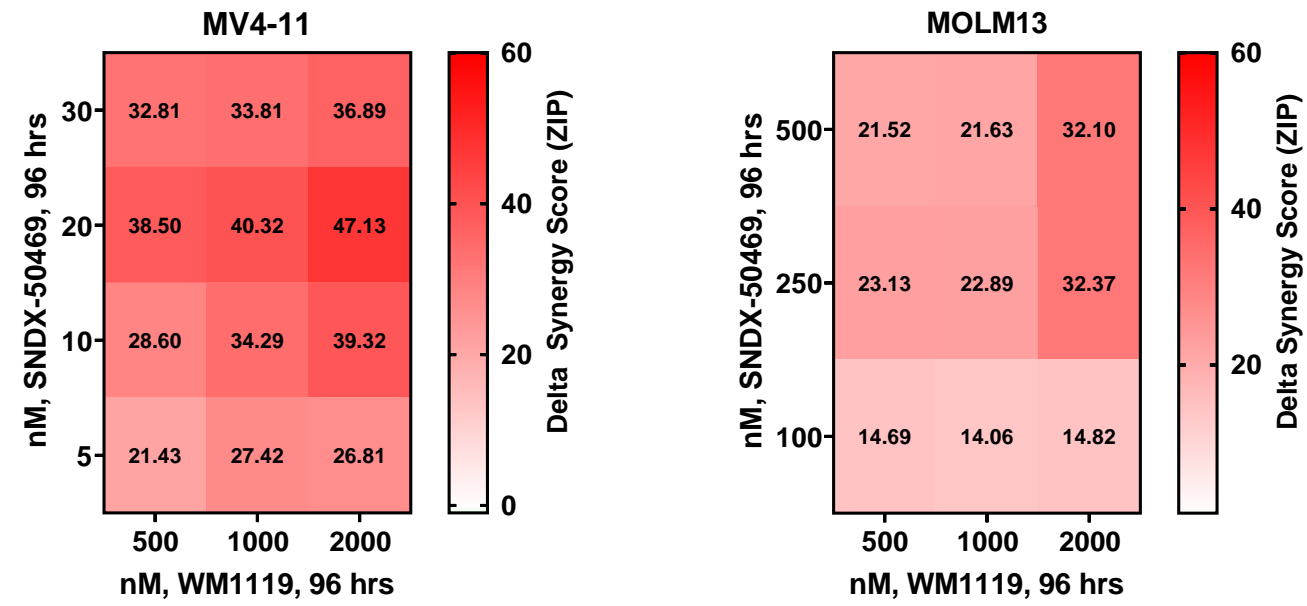

Figure S12

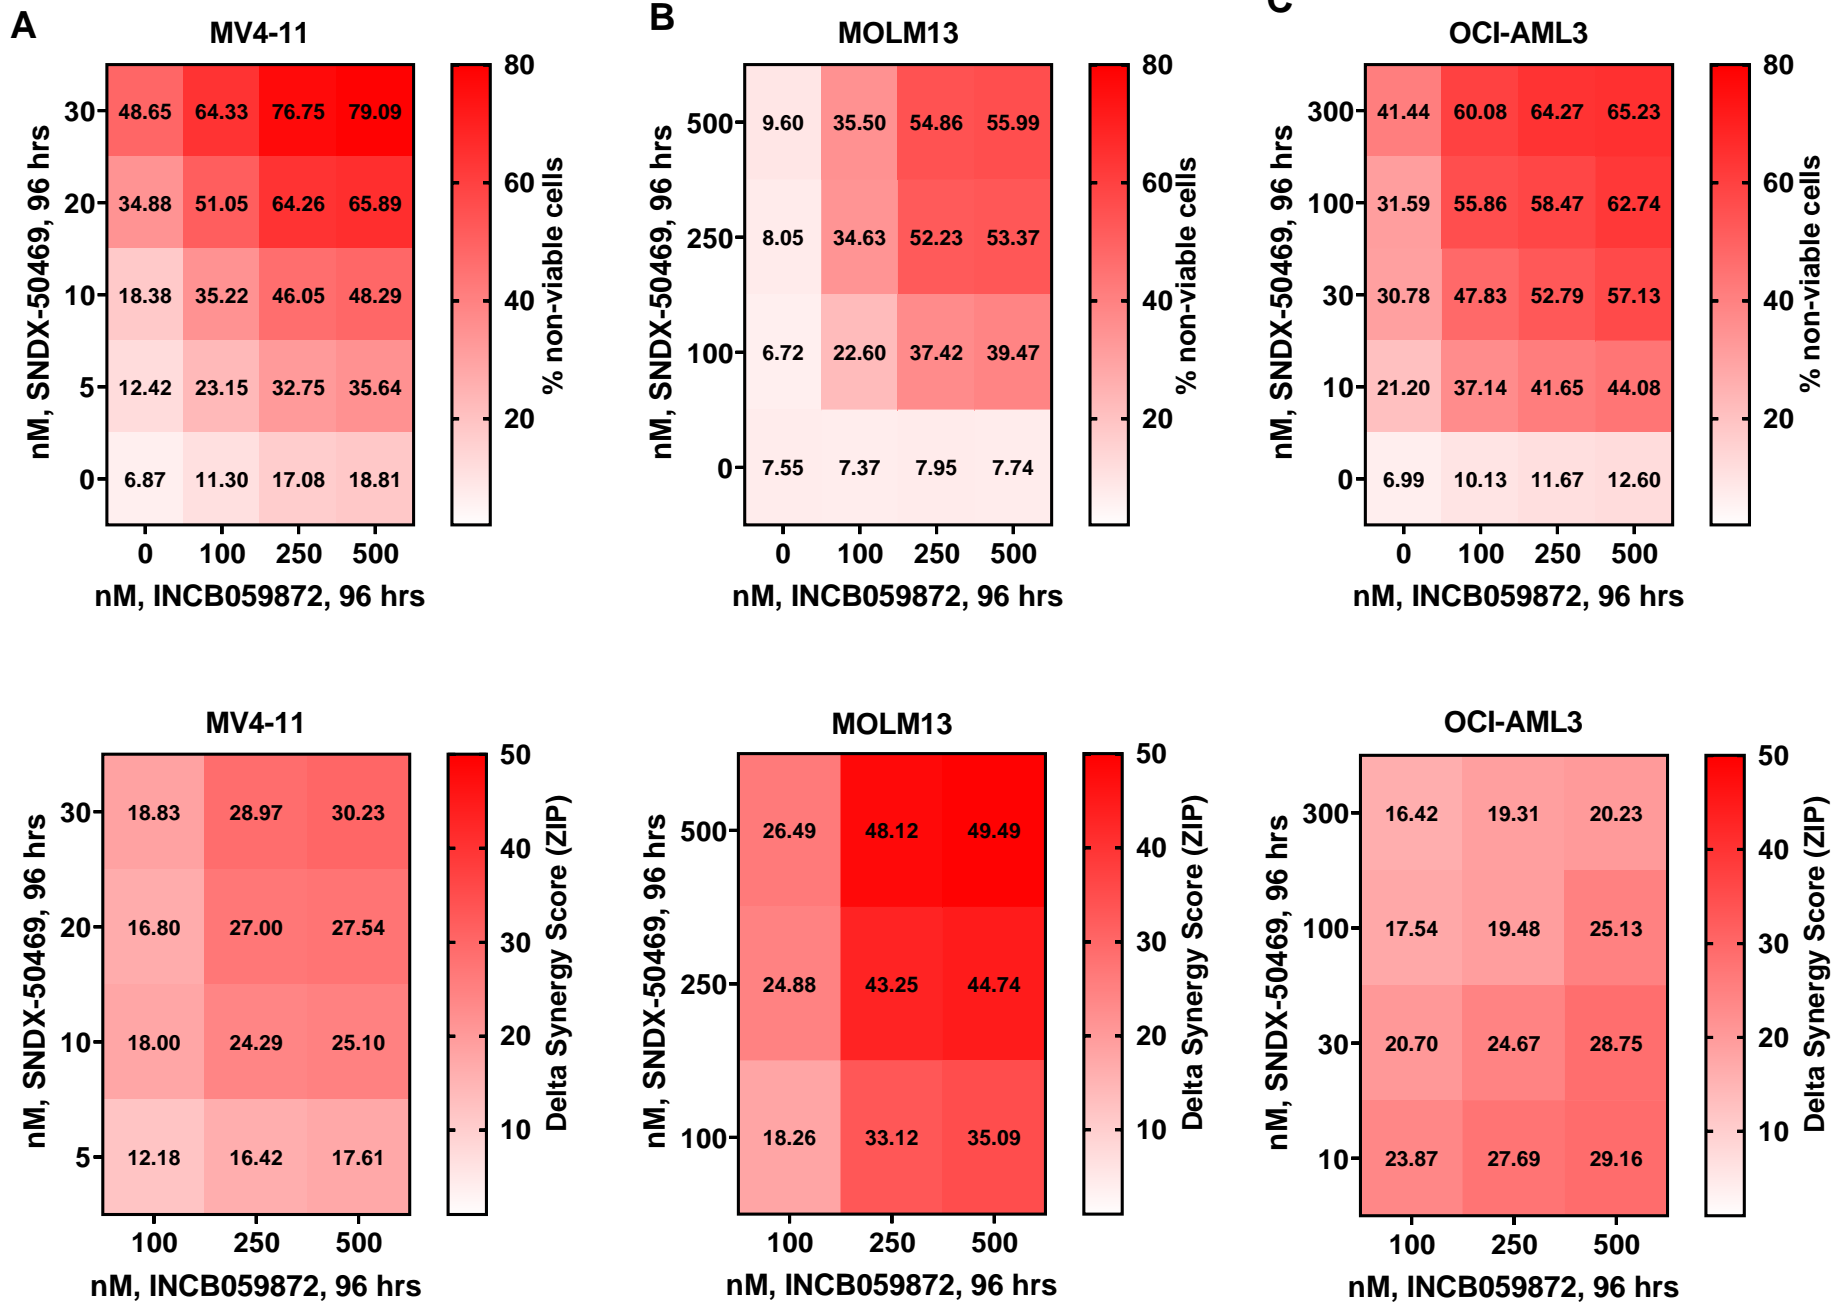

Figure S13

**D PD MLL-AF9 + FLT3-TKD AML#4**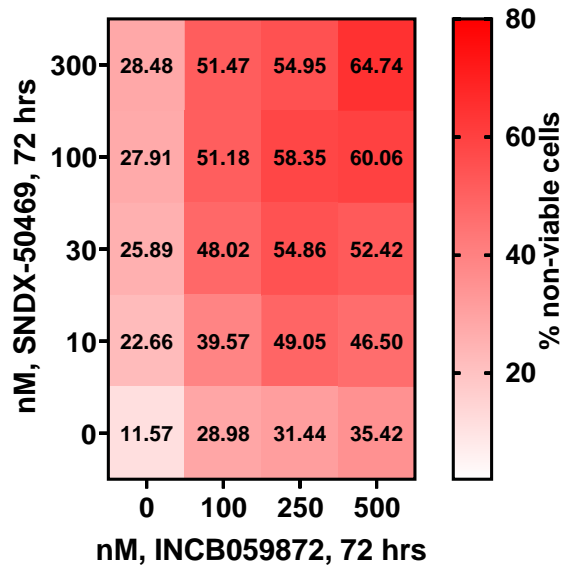**E PD mtNPM1 + FLT3-ITD AML#13**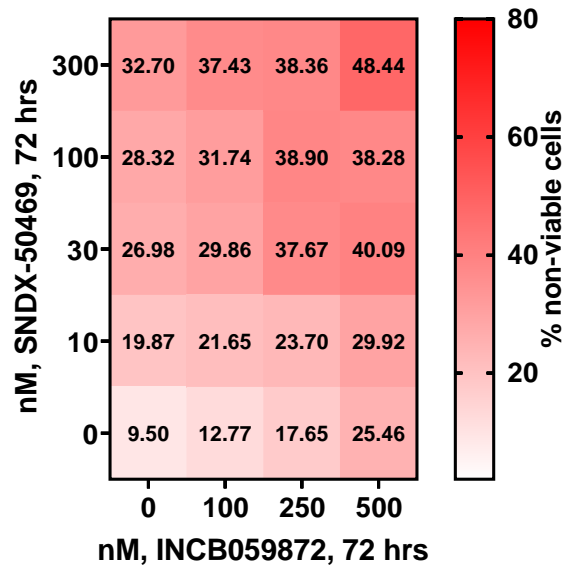**F PD mtNPM1 + FLT3-ITD AML#1**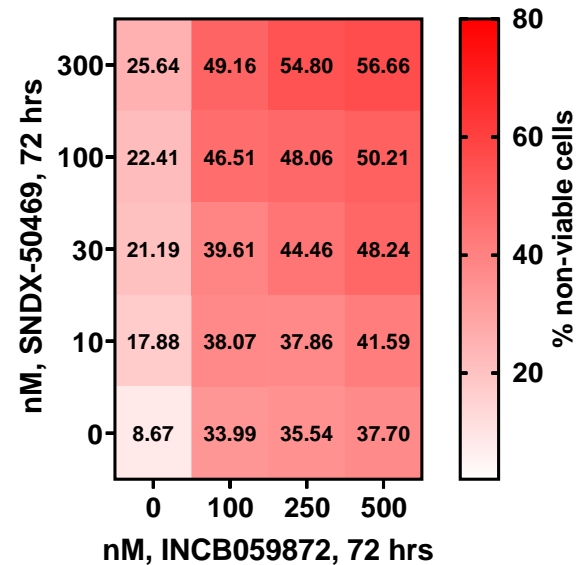**PD MLL-AF9 + FLT3-TKD AML#4**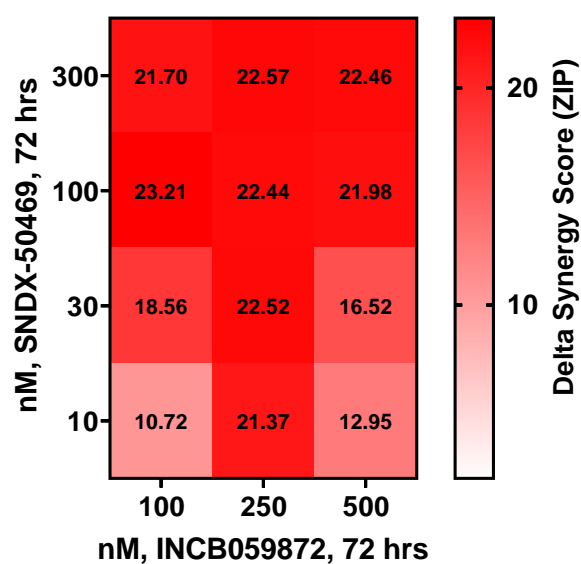**PD mtNPM1 + FLT3-ITD AML#13**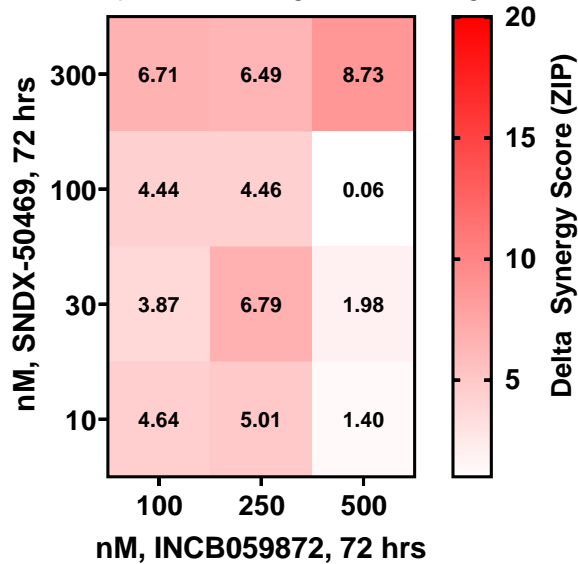**PD mtNPM1 + FLT3-ITD AML#1**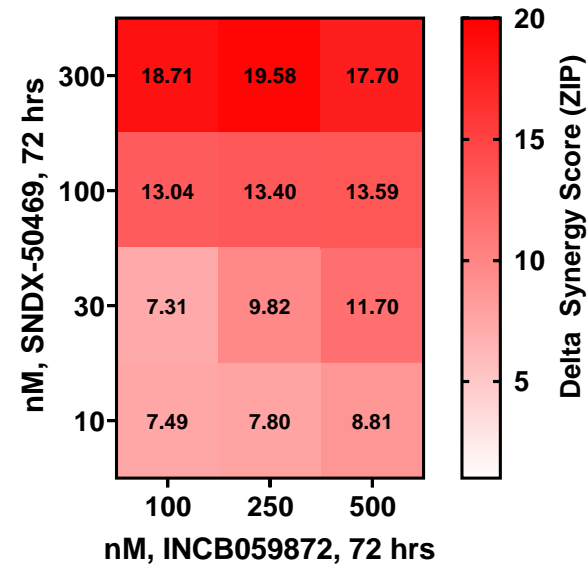

**G****SNDX-50469 and INCB**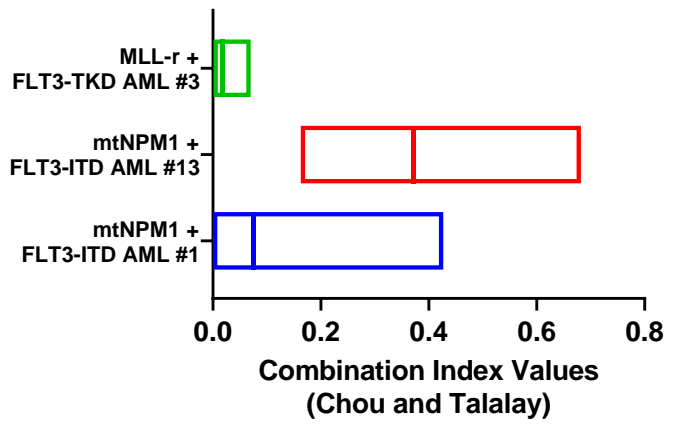



**A****MOLM13**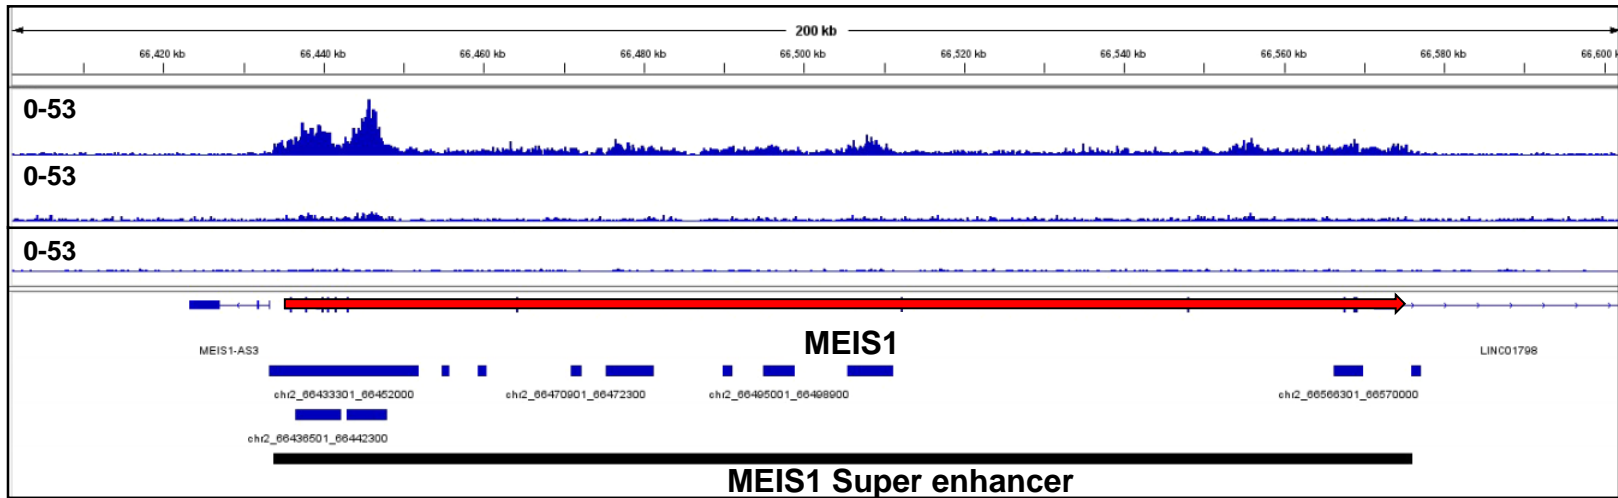**B****MOLM13**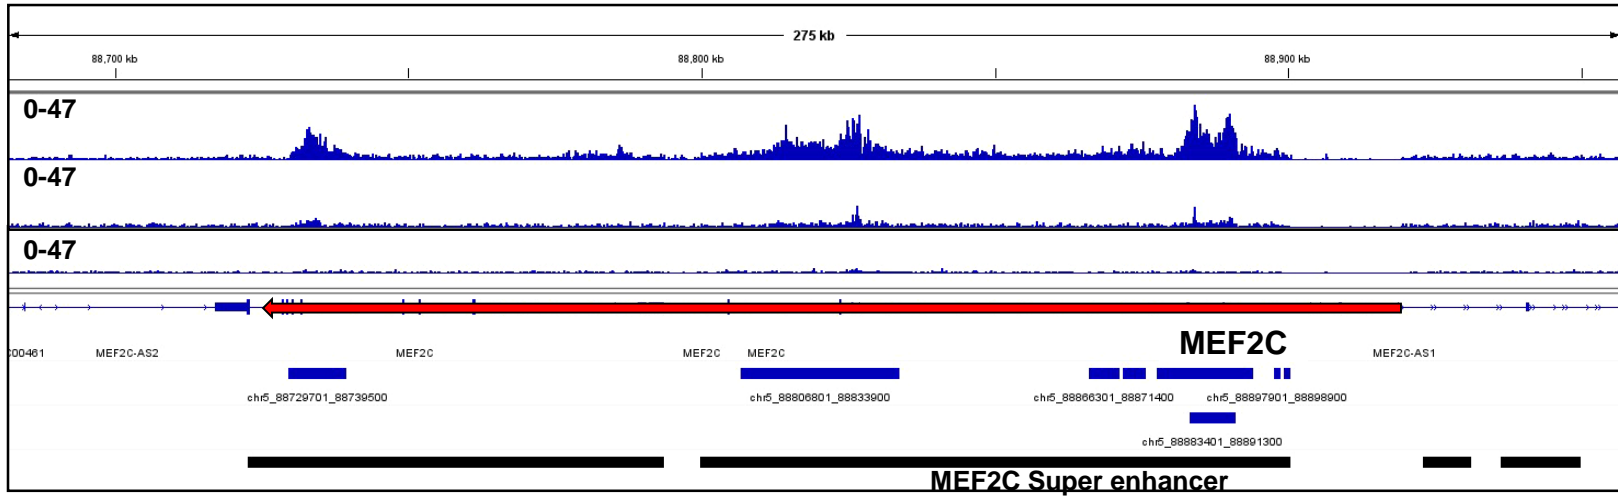

**C****MOLM13**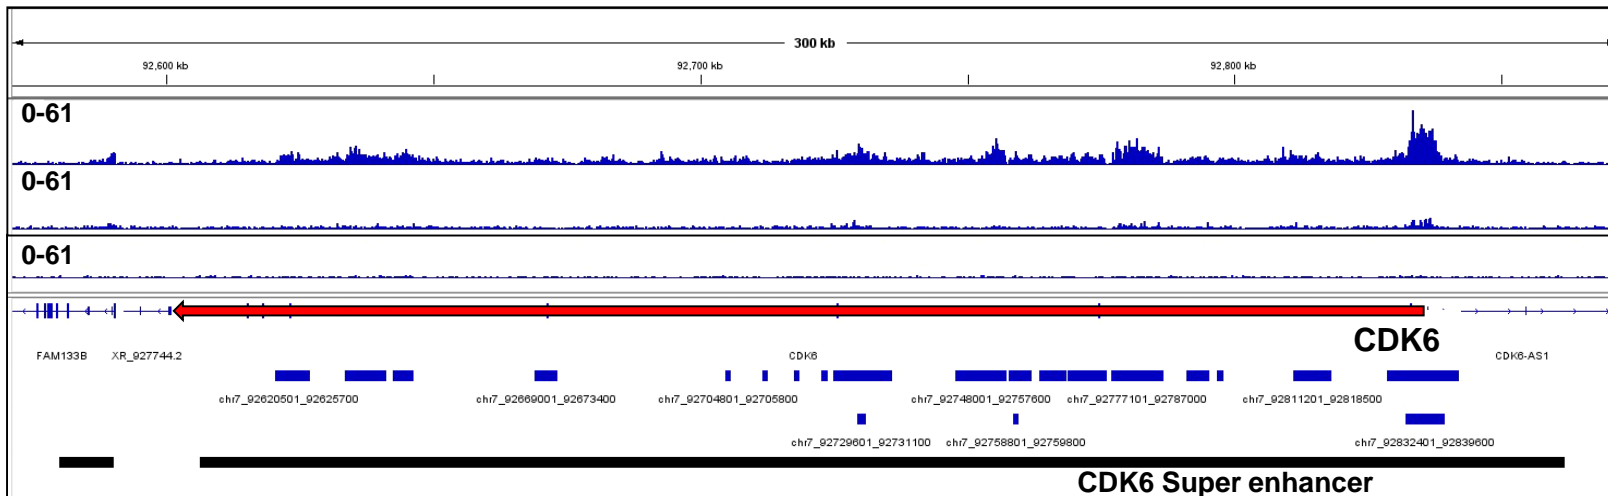**D****MOLM13**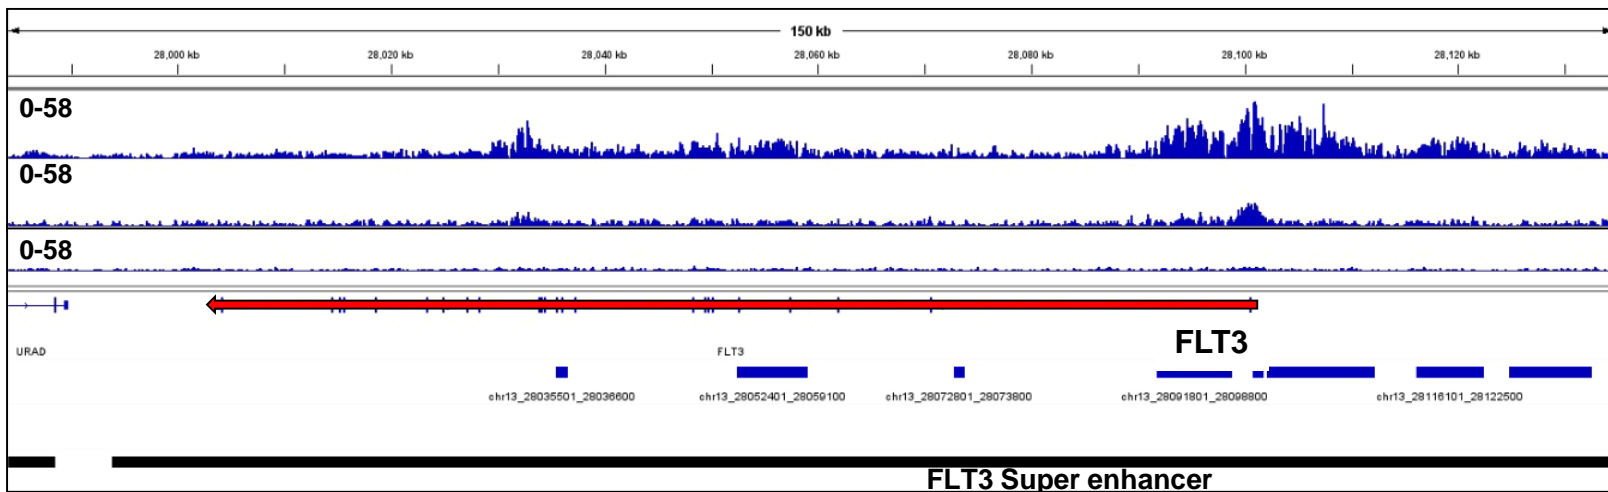

**E**

**MOLM13**

500 nM SNDX    SNDX + OTX015

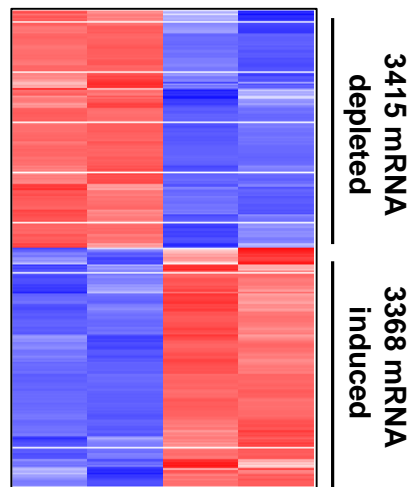

1.25 fold and  $p < 0.05$

**F**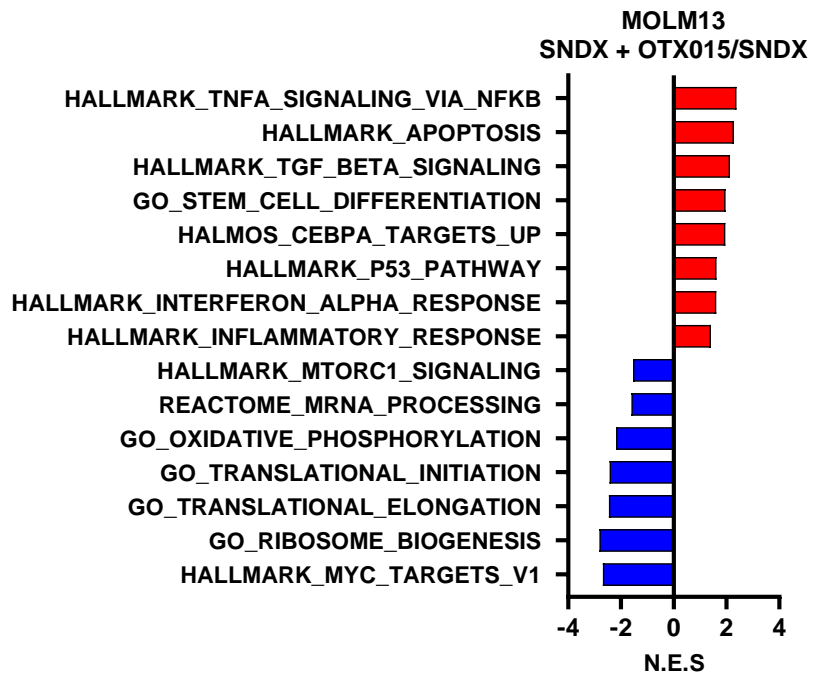

Supplement: 41408_2023_826_MOESM3_ESM.pdf [file 41408_2023_826_MOESM3_ESM.pdf]
