# Supplementary material for: Targeting of epigenetic co-dependencies enhances anti-AML efficacy of Menin inhibitor in AML with MLL1-r or mutant NPM1
Source: PubMed Central journal article supplement (PMC10102188; doi:10.1038/s41408-023-00826-6), 2023-04-13
Supplement: 41408_2023_826_MOESM1_ESM.pdf [file 41408_2023_826_MOESM1_ESM.pdf]

Warren Fiskus<sup>1</sup>,

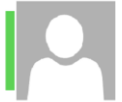

Fri 3/31/2023 3:49 PM

Fiskus, Warren C

RE: Change in authorship agreement for 23-BCJ-0116RR

To  Bhalla, Kapil

---

I agree to the change in authorship for the manuscript

Regards,

Warren Fiskus

Christopher P. Mill<sup>1</sup>,

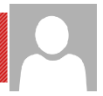

Fri 3/31/2023 3:41 PM

Mill, Christopher P

RE: Change in authorship agreement for 23-BCJ-0116RR

To  Fiskus, Warren C

---

Greetings Warren,

I agree to the change in authorship in the revised menin manuscript.

Regards,

Christopher

Christine Birdwell<sup>1</sup>,

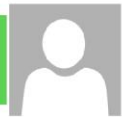

Fri 3/31/2023 4:24 PM

Birdwell, Christine E

RE: Change in authorship agreement for 23-BCJ-0116RR

To  Fiskus, Warren C

---

Dear Warren,

I agree to the authorship changes.

Sincerely,

Christine Birdwell

John A. Davis<sup>1</sup>,

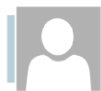

Fri 3/31/2023 3:42 PM

Davis, John A

RE: Change in authorship agreement for 23-BCJ-0116RR

To ■ Fiskus, Warren C; ■ Bhalla, Kapil; □ Steffen.Boettcher@usz.ch; □ gmcgeehan@syndax.com; □ vakoc@cshl.edu; ■ Soth, Michael J;  
■ Heffernan, Tim; ■ Su, Xiaoping; ■ Ruan, Xinjia

Cc ■ Mill, Christopher P; ■ Birdwell, Christine E; ■ Das, Kaberi; ■ Kadia, Tapan Mahendra; ■ DiNardo, Courtney; ■ Takahashi, Koichi; ■ Loghavi, Sanam;  
■ Daver, Naval

I agree with the aforementioned changes to the manuscript authorship.

John Davis

Kaberi Das<sup>1</sup>,

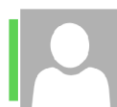

Fri 3/31/2023 3:58 PM

Das, Kaberi

RE: Change in authorship agreement for 23-BCJ-0116RR

To ■ Davis, John A; ■ Fiskus, Warren C; ■ Bhalla, Kapil; □ Steffen.Boettcher@usz.ch; □ gmcgeehan@syndax.com; □ vakoc@cshl.edu;  
■ Soth, Michael J; ■ Heffernan, Tim; ■ Su, Xiaoping; ■ Ruan, Xinjia

Cc ■ Mill, Christopher P; ■ Birdwell, Christine E; ■ Kadia, Tapan Mahendra; ■ DiNardo, Courtney; ■ Takahashi, Koichi; ■ Loghavi, Sanam; ■ Daver, Naval

I agree to the change in authorship in the revised manuscript.

Kaberi Das

Steffen Boettcher<sup>2</sup>,

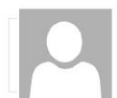

Sat 4/1/2023 7:24 AM

Böttcher Steffen <Steffen.Boettcher@usz.ch>

[EXTERNAL] AW: [EXTERN] Change in authorship agreement for 23-BCJ-0116RR

To ■ Fiskus, Warren C; ■ Bhalla, Kapil; □ gmcgeehan@syndax.com; □ vakoc@cshl.edu; ■ Soth, Michael J; ■ Heffernan, Tim; ■ Su, Xiaoping;  
■ Ruan, Xinjia

Cc ■ Mill, Christopher P; ■ Birdwell, Christine E; ■ Davis, John A; ■ Das, Kaberi; ■ Kadia, Tapan Mahendra; ■ DiNardo, Courtney; ■ Takahashi, Koichi;  
■ Loghavi, Sanam; ■ Daver, Naval

**THIS EMAIL IS A PHISHING RISK**

Do you trust the sender?

The email address is: [steffen.boettcher@usz.ch](mailto:steffen.boettcher@usz.ch)

While this email has passed our filters, we need you to review with caution before taking any action.  
If the email looks at all suspicious, click the Report a Phish button.

I agree as well.

Best,

Steffen

Tapan M. Kadia<sup>1</sup>,

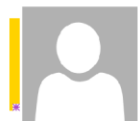

Sat 4/1/2023 2:15 PM

Kadia, Tapan Mahendra

Re: Change in authorship agreement for 23-BCJ-0116RR

To Fiskus, Warren C

Cc Heffernan, Tim; Bhalla, Kapil

Thanks Warren. Yes of course I approve!

Sent from my iPhone

Courtney D. DiNardo<sup>1</sup>,

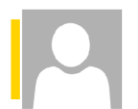

Fri 3/31/2023 4:05 PM

DiNardo, Courtney

Re: Change in authorship agreement for 23-BCJ-0116RR

To Das, Kaberi

Cc Davis, John A; Fiskus, Warren C; Bhalla, Kapil; Steffen.Boettcher@usz.ch; gmcgeehan@syndax.com; vakoc@cshl.edu; Soth, Michael J; Heffernan, Tim; Su, Xiaoping; Ruan, Xinjia; Mill, Christopher P; Birdwell, Christine E; Kadia, Tapan Mahendra; Takahashi, Koichi; Loghavi, Sanam; Daver, Naval

I agree to the change in authorship as proposed

Sent from my iPhone

Koichi Takahashi<sup>1</sup>,

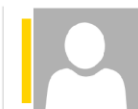

Fri 3/31/2023 3:16 PM

Takahashi, Koichi

RE: Change in authorship agreement for 23-BCJ-0116RR

To Fiskus, Warren C

Approve!

Sanam Loghavi<sup>1</sup>,

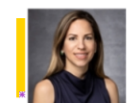

Fri 3/31/2023 4:27 PM

Loghavi, Sanam

Re: [EXTERNAL] RE: Change in authorship agreement for 23-BCJ-0116RR

To Gerard McGeehan

Cc Das, Kaberi; Davis, John A; Fiskus, Warren C; Bhalla, Kapil; steffen.boettcher@usz.ch; vakoc@cshl.edu; Soth, Michael J; Heffernan, Tim; Su, Xiaoping; Ruan, Xinjia; Mill, Christopher P; Birdwell, Christine E; Kadia, Tapan Mahendra; DiNardo, Courtney; Takahashi, Koichi; Daver, Naval

I agree

Michael J. Soth<sup>1</sup>,

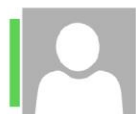

Fri 3/31/2023 4:10 PM

Soth,Michael J

RE: Change in authorship agreement for 23-BCJ-0116RR

To Fiskus,Warren C

I agree to the change.

**Michael J. Soth, Ph.D.**

*Institute Director, Medicinal Chemistry*

*Institute for Applied Cancer Science*

*MD Anderson Cancer Center*

*E-mail: [MJSoth@mdanderson.org](mailto:MJSoth@mdanderson.org)*

*Phone: 713-745-3914*

Tim Heffernan<sup>1</sup>,

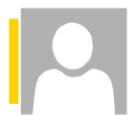

Sat 4/1/2023 2:32 PM

Heffernan,Tim

Re: Change in authorship agreement for 23-BCJ-0116RR

To Kadia,Tapan Mahendra

Cc Fiskus,Warren C; Bhalla,Kapil

I approve. Thank you Warren

Sent from my iPhone

Gerard M. McGeehan<sup>3</sup>,

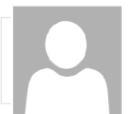

Fri 3/31/2023 4:07 PM

Gerard McGeehan <[gmcgeehan@syndax.com](mailto:gmcgeehan@syndax.com)>

[EXTERNAL] RE: Change in authorship agreement for 23-BCJ-0116RR

To Das,Kaberi; Davis,John A; Fiskus,Warren C; Bhalla,Kapil; Steffen.Boettcher@usz.ch; vakoc@cshl.edu; Soth,Michael J; Heffernan,Tim; Su,Xiaoping; Ruan,Xinjia

Cc Mill,Christopher P; Birdwell,Christine E; Kadia,Tapan Mahendra; DiNardo,Courtney; Takahashi,Koichi; Loghavi,Sanam; Daver,Naval

**THIS EMAIL IS A PHISHING RISK**

Do you trust the sender?

The email address is: [gmcgeehan@syndax.com](mailto:gmcgeehan@syndax.com)

While this email has passed our filters, we need you to review with caution before taking any action.

If the email looks at all suspicious, click the Report a Phish button.

I agree to the change as well.

**Jerry McGeehan, Ph.D.**

*Vice President, Menin Program*

**Syndax Pharmaceuticals, Inc.**

C. 484.431.9385

[gmcgeehan@syndax.com](mailto:gmcgeehan@syndax.com)

Xinjia Ruan<sup>1</sup>,

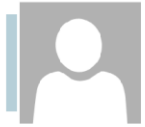

Fri 3/31/2023 3:45 PM

Ruan, Xinjia

RE: Change in authorship agreement for 23-BCJ-0116RR

To  Fiskus, Warren C

Dear Warren,

Thanks for your email. I agree to the change of authorship in the revised manuscript.

Best regards,  
Xinjia Ruan

Xiaoping Su<sup>1</sup>,

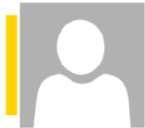

Fri 3/31/2023 3:35 PM

Su, Xiaoping

RE: Change in authorship agreement for 23-BCJ-0116RR

To  Fiskus, Warren C

I agree to the change in authorship in the revised manuscript.

Thanks!  
Xiaoping

Christopher R. Vakoc<sup>4</sup>,

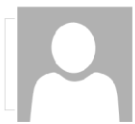

Fri 3/31/2023 3:54 PM

Vakoc, Christopher <vakoc@cshl.edu>

[EXTERNAL] Re: Change in authorship agreement for 23-BCJ-0116RR

To  Fiskus, Warren C

THIS EMAIL IS A PHISHING RISK

Do you trust the sender?

The email address is: [vakoc@cshl.edu](mailto:vakoc@cshl.edu)

While this email has passed our filters, we need you to review with caution before taking any action.

If the email looks at all suspicious, click the Report a Phish button.

I agree to this authorship change  
Sent from my iPhone

Naval Daver<sup>1</sup>,

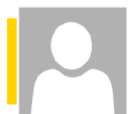

Fri 3/31/2023 3:14 PM

Daver,Naval

Re: Change in authorship agreement for 23-BCJ-0116RR

To  Fiskus,Warren C;  Bhalla,Kapil

I agree with this change in authorship.

Thanks

Naval Daver

Kapil N. Bhalla<sup>1</sup>

I agree with the change in authorship in the revised manuscript.

Kapil
